# Supplementary material
Source: ML conference proceedings conference paper supplement (https://openreview.net/forum?id=kVz9uvqUna)
Supplement: supplementary_material [file full.pdf › full.pdf]

---

# On the Closed-Form of Flow Matching: Generalization Does Not Arise from Target Stochasticity

---

Anonymous Author(s)

Affiliation

Address

email

## Abstract

1 Modern deep generative models can now produce high-quality synthetic samples  
2 that are often indistinguishable from real training data. A growing body of research  
3 aims to understand why recent methods – such as diffusion and flow matching  
4 techniques – generalize so effectively. Among the proposed explanations are the  
5 inductive biases of deep learning architectures and the stochastic nature of the  
6 conditional flow matching loss. In this work, we rule out the latter – the noisy  
7 nature of the loss – as a primary contributor to generalization in flow matching.  
8 First, we empirically show that in high-dimensional settings, the stochastic and  
9 closed-form versions of the flow matching loss yield nearly equivalent losses.  
10 Then, using state-of-the-art flow matching models on standard image datasets, we  
11 demonstrate that both variants achieve comparable statistical performance, with the  
12 surprising observation that using the closed-form can even improve performance.

## 13 1 Introduction

14 Recent deep generative models, such as diffusion (Sohl-Dickstein et al., 2015; Ho et al., 2020a; Song  
15 et al., 2021) and flow matching models (Lipman et al., 2023; Albergo and Vanden-Eijnden, 2023;  
16 Liu et al., 2023), have achieved remarkable success in synthesizing realistic data across a wide range  
17 of domains. State-of-the-art diffusion and flow matching methods are now capable of producing  
18 multi-modal outputs that are virtually indistinguishable from human-generated content, including  
19 images (Stability AI, 2023), audio (Borsos et al., 2023), video (Villegas et al., 2022; Brooks et al.,  
20 2024), and text (Gong et al., 2023; Xu et al., 2025).

21 A central question in deep generative modeling concerns the generalization capabilities and underlying  
22 mechanisms of these models. Generative models generalization remains a puzzling phenomenon,  
23 raising a number of challenging and unresolved questions: whether generative models truly generalize  
24 is still the subject of active debate. On one hand, several studies (Carlini et al., 2023; Somepalli  
25 et al., 2023b,a; Dar et al., 2023) have shown that large diffusion models are capable of memorizing  
26 individual samples from the training set, including licensed photographs, trademarked logos, and  
27 sensitive medical data.

28 On the other hand, Kadkhodaie et al. (2024) have empirically demonstrated that while memorization  
29 can occur in low-data regimes, diffusion models trained on a *sufficiently large* dataset exhibit clear  
30 signs of generalization. Taken together, recent work points to a sharp phase transition between  
31 memorization and generalization (Yoon et al., 2023; Zhang et al., 2024). Multiple theories have been  
32 proposed to explain the puzzling generalization of diffusion and flow matching models. On the one  
33 hand, Kadkhodaie et al. (2024); Kamb and Ganguli (2024); Ross et al. (2025) suggested a geometric  
34 framework to understand the inductive bias of modern deep convolutional networks on images. On  
35 the other hand, Vastola (2025) suggested that generalization is due to the *noisy* nature of the training  
36 loss. In this work, we clearly answer the following question:

Does training on noisy/stochastic targets improve flow matching generalization?  
If not, what are the main sources of generalization?

### Contributions.

- We challenge the prevailing belief that generalization in flow matching stems from an inherently noisy loss (Section 3.1). This assumption, largely supported by studies in low-dimensional settings, fails to hold in realistic high-dimensional data regimes.
- Instead, we observe that generalization in flow matching emerges precisely when the limited-capacity neural network fails to approximate the exact velocity field (Section 3.2).
- We identify two critical time intervals – at early and late times – where this approximation breaks down (Section 3.3). We show that generalization arises predominantly early along flow matching trajectories, aligning with the transition from the stochastic to the deterministic regime of the flow matching objective.
- Finally, on standard image datasets (CIFAR-10 and CelebA), we show that explicitly regressing against the exact velocity field does not impair generalization and can, in some cases, enhance it (Section 4).

The manuscript is organized as follows. Section 2 reviews the fundamentals of conditional flow matching and recalls the closed-form of the “optimal” velocity field. Leveraging the closed-form expression of the flow matching velocity field, Section 3 investigates the key sources of generalization in flow matching. In Section 4, we introduce a learning algorithm based on the closed-form formula. Related work is discussed in detail in Section 5.

## 2 Recalls on conditional flow matching

Let  $p_0$  be the source distribution and  $p_{\text{data}}$  the data distribution. We are given  $n$  data points  $x^{(1)}, \dots, x^{(n)} \sim p_{\text{data}}$ ,  $x^{(i)} \in \mathbb{R}^d$ . The goal of flow matching is to find a velocity field  $u : \mathbb{R}^d \times [0, 1] \rightarrow \mathbb{R}^d$ , such that, if one solves on  $[0, 1]$  the ordinary differential equation

$$\begin{cases} x(0) = x_0 \in \mathbb{R}^d \\ \dot{x}(t) = u(x(t), t) \end{cases} \quad (1)$$

then the law of  $x(1)$  when  $x_0 \sim p_0$  is  $p_{\text{data}}$  (in which case we say that  $u$  transports  $p_0$  to  $p_{\text{data}}$ ). For every value of  $t$  between 0 and 1, the law of  $x(t)$  defines a *probability path*, denoted  $p(\cdot|t)$  that progressively goes from  $p_0$  to  $p_{\text{data}}$ . If one knows  $u$ , new samples can then be generated by sampling  $x_0$  from  $p_0$ , solving the ordinary differential equation, and using  $x(1)$  as the generated point.

In conditional flow matching, finding such a  $u$  is achieved in the following way.

- First, a conditioning variable  $z$  independent of  $t$  is defined, e.g.  $z = x_1 \sim p_{\text{data}}$ ,
- Then, a conditional probability path  $p(\cdot|z, t)$  is chosen, e.g.<sup>1</sup>  $p(\cdot|z = x_1, t) = \mathcal{N}(tx_1, (1 - t)^2 \cdot \text{Id})$ .

Through the continuity equation (Lipman et al., 2024, Sec. 3.5), the choice of  $p(\cdot|z, t)$  defines a conditional velocity field  $u^{\text{cond}}(x, z, t)$ . In the setting of (i) and (ii), we can for example choose  $u^{\text{cond}}(x, z = x_1, t) = \frac{x_1 - x}{1 - t}$ . By marginalization against  $z$ , conditional flow matching defines a probability path  $p(\cdot|t)$  and a “total” velocity field

$$u^*(x, t) = \mathbb{E}_{z|x, t} u^{\text{cond}}(x, z, t) , \quad (2)$$

which turns out to transport  $p_0$  to  $p_{\text{data}}$  (Lipman et al., 2023, Thm. 1). Hence  $u^*$  could be approximated by a neural network  $u_\theta : \mathbb{R}^d \times [0, 1] \rightarrow \mathbb{R}^d$  with parameters  $\theta$  by minimizing

$$\mathcal{L}_{\text{FM}}(\theta) = \mathbb{E}_{t \sim \mathcal{U}([0, 1])} \mathbb{E}_{x_t \sim p(\cdot|t)} \|u_\theta(x_t, t) - u^*(x_t, t)\|^2 , \quad (3)$$

but the usual observation is that  $u^*$  is intractable. As a remedy, Lipman et al. (2023, Thm. 2) show that  $\mathcal{L}_{\text{FM}}(\theta)$  is equal up to a constant to the conditional flow matching loss, which for the choices (i)

<sup>1</sup>this choice is only valid when  $p_0 = \mathcal{N}(0, \text{Id})$ , which for simplicity we will assume in the sequel; more generic choices are possible and we refer the reader to Lipman et al. (2024); Gagneux et al. (2025) for deeper introductions to flow matching

77 and (ii) made above reads

$$\mathcal{L}_{\text{CFM}}(\theta) = \mathbb{E}_{\substack{x_0 \sim p_0 \\ x_1 \sim p_{\text{data}} \\ t \sim \mathcal{U}([0,1])}} \|u_\theta(x_t, t) - u^{\text{cond}}(x_t, z = x_1, t)\|^2, \text{ where } x_t := (1-t)x_0 + tx_1. \quad (4)$$

78 Note that, since  $x_t := (1-t)x_0 + tx_1$ , we have that  $u^{\text{cond}}(x_t, z = x_1, t)$  is both equal to  $\frac{x_1 - x_0}{1-t}$  and to  
 79  $x_1 - x_0$ . The objective  $\mathcal{L}_{\text{CFM}}$  is easy to approximate, since it is easy to sample from  $p_0$  and  $\mathcal{U}([0, 1])$ ;  
 80 sampling from  $p_{\text{data}}$  is approximated by sampling from  $\hat{p}_{\text{data}} := \frac{1}{n} \sum_{i=1}^n \delta_{x^{(i)}}$ . Although it seems  
 81 natural, replacing  $p_{\text{data}}$  by  $\hat{p}_{\text{data}}$  in (4) has a very important consequence: it makes the minimizer  $\hat{u}^*$   
 82 of  $\mathcal{L}_{\text{FM}}$  available in closed-form, which we recall below.

83 **Proposition 1** (Velocity Closed-form Formula). *When  $p_{\text{data}}$  is replaced by  $\hat{p}_{\text{data}}$ , with the previous*  
 84 *choices, the velocity field in (2) has a closed-form formula:*

$$\hat{u}^*(x, t) = \sum_{i=1}^n u^{\text{cond}}(x, z = x^{(i)}, t) \cdot \frac{p(x|z = x^{(i)}, t)}{\sum_{i'=1}^n p(x|z = x^{(i')}, t)}. \quad (5)$$

85 *The notation  $\hat{u}^*$  emphasizes the velocity field is optimal for the empirical probability distribution*  
 86  *$\hat{p}_{\text{data}}$ , not the true one  $p_{\text{data}}$ . Since  $u^{\text{cond}}(x, z = x^{(i)}, t) \propto x^{(i)} - x$ , the optimal velocity field  $\hat{u}^*$  is*  
 87 *a weighted average of the  $n$  different directions  $x^{(i)} - x$ . More specifically, it writes as follows:*

$$\hat{u}^*(x, t) = \sum_{i=1}^n \lambda_i(x, t) \frac{x^{(i)} - x}{1-t}, \quad (6)$$

88 *with  $\lambda(x, t) = \text{softmax}((-\frac{1}{2(1-t)^2} \|x - tx^{(i')}\|^2)_{i'=1, \dots, n}) \in \mathbb{R}^n$ . This formula also holds for a*  
 89 *Gaussian source distribution and  $z \sim p_0 \times \hat{p}_{\text{data}}$  (Appendix A.1).*

90 This result can be found in various previous works, e.g., [Kamb and Ganguli \(2024, Eq. 3\)](#), [Biroli](#)  
 91 [et al. \(2024\)](#), [Gao and Li \(2024\)](#), [Li et al. \(2024\)](#) or [Scarvelis et al. \(2025\)](#). Note that the closed-form  
 92 formula (5) is also valid for other choices of continuous distribution  $p_0$  (e.g., the uniform distribution).

93 From Equation (6), as  $t \rightarrow 1$ , the velocity field  $\hat{u}^*$  diverges at any point  $x$  that does not coincide  
 94 with one of the training samples  $x^{(i)}$ , and it points in the direction of the nearest  $x^{(i)}$ . This creates a  
 95 paradox: solving the ordinary differential equation (1) with the velocity field  $\hat{u}^*$  can only produce  
 96 training samples  $x^{(i)}$  (see [Gao and Li 2024](#), Thm. 4.6 for a formal proof). Therefore, in practice,  
 97 exactly minimizing the conditional flow matching loss would result in  $u_\theta = \hat{u}^*$ , meaning the model  
 98 memorizes the training data and fails to generalize. This naturally yields the following question:

99 *How can flow matching generalize if the optimal velocity field only generates training samples?*

### 100 3 Investigating the key sources of generalization

101 In this section, we investigate the key sources of flow matching generalization using the closed-form  
 102 formula of its velocity field. First in Section 3.1 we challenge the claim that generalization stems  
 103 from the stochastic approximation  $u^{\text{cond}}$  of the optimal velocity field  $\hat{u}^*$ . Then, in Section 3.2 we  
 104 show that generalization arises when  $u_\theta$  fails to approximate the perfect velocity  $\hat{u}^*$ . Interestingly,  
 105 the target velocity estimation particularly fails at two critical time intervals. Section 3.3 shows that  
 106 one of these critical times is particularly important for generalization.

#### 107 3.1 Target stochasticity is not what you need

108 One recent hypothesis is that generalization arises from the fact that the regression target  $u^{\text{cond}}$  of  
 109 conditional flow matching is only a stochastic estimate of  $\hat{u}^*$ . The fact that the target regression  
 110 objective only equals the true objective on average is referred to by [Vastola \(2025\)](#) as “generalization  
 111 through variance”. To challenge this assumption, we leverage Proposition 1, which states that the  
 112 optimal velocity field  $\hat{u}^*(x, t)$  is a weighted sum of the  $n$  values of  $u^{\text{cond}}(x, t, z = x^{(i)}) = \frac{x^{(i)} - x}{1-t}$ ,  
 113 for  $i \in [n]$ , and show that, after a *small time value*  $t$ , this average is in practice equal to a single value  
 114 in the expectation (see Figures 1a and 1b).

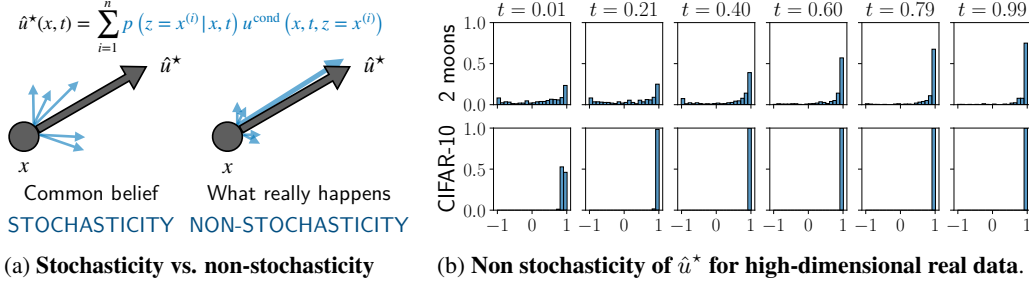

Figure 1: We challenge the hypothesis that target stochasticity plays a major role in flow matching generalization. The histograms of the cosine similarities between  $\hat{u}^*((1-t)x_0 + tx_1, t)$  and  $u^{\text{cond}}((1-t)x_0 + tx_1, z = x_1, t) = x_1 - x_0$  are displayed for various time values  $t$  and two datasets. *For real, high-dimensional data, non-stochasticity arises very early* (before  $t = 0.2$  for CIFAR-10 with dimension  $(3, 32, 32)$ ).

**Comments on Figure 1b.** To produce Figure 1b, we sample 256 pairs  $(x_0, x_1)$  from  $p_0 \times \hat{p}_{\text{data}}$ . For each value of  $t$ , we compute the cosine similarity between the optimal velocity field  $\hat{u}^*((1-t)x_0 + tx_1, t)$  and the conditional target  $u^{\text{cond}}((1-t)x_0 + tx_1, z = x_1, t) = x_1 - x_0$ . The resulting similarities are aggregated and shown as histograms. The top row displays the results for the two-moons toy dataset ( $d = 2$ ), and the bottom row displays the results for the CIFAR-10 dataset (Krizhevsky and Hinton 2009,  $d = 3072$ );  $n = 50k$  for both. As  $t$  increases, the histograms become increasingly concentrated around 1, indicating that  $\hat{u}^*$  aligns closely with a single conditional vector  $u^{\text{cond}}$ . From Equation (6), this corresponds to a collapse towards 0 of all but one of the softmax weights  $\lambda_i(x_t, t)$ . This time corresponds to the collapse time studied by Biroli et al. (2024) for diffusion; we discuss the connection in the related works (Section 5). On the two-moons toy dataset, this transition occurs for intermediate-to-large values of  $t$ , echoing the observations made in low-dimensional settings by Vastola (2025, Figure 1). In contrast, for high-dimensional real datasets,  $\hat{u}^*(x, t)$  aligns with a single conditional velocity field  $x^{(i)} - x$ , even at early time steps, suggesting that the non-stochastic regime dominates most of the generative process. This key difference between low- and high-dimensional data suggests that the transition time between the stochastic and non-stochastic regimes is strongly influenced by the dimensionality of the data.

**Dimension dependence.** To further illustrate the strong impact of dimensionality, Figure 2 reports the proportion of samples  $x_t$  (from a batch of 256) for which the cosine similarity between  $\hat{u}^*$  and  $u^{\text{cond}} \propto x^{(i)} - x$  exceeds 0.9, as a function of time  $t$ . This analysis is performed across multiple spatial resolutions of the Imagenette dataset, obtaining  $d \times d$  images by spatial subsampling. Figure 2 reveals a sharp transition: as the dimensionality increases, the proportion of high-cosine matches rapidly converges to 100%.

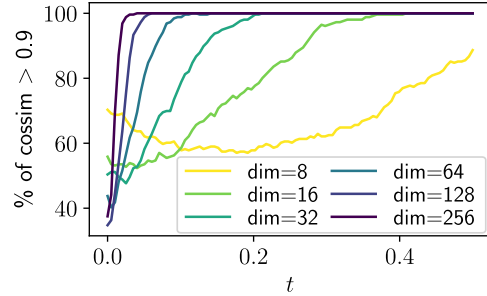

Figure 2: Alignment of  $\hat{u}^*$  and  $u^{\text{cond}}$  over time for varying image dimensions  $d$  on Imagenette.

A practical implication of this behavior is that, for sufficiently large  $t$ , if  $x_0 \sim p_0$  and  $x^{(i)} \sim \hat{p}_{\text{data}}$ , then  $\hat{u}^*((1-t)x_0 + tx^{(i)}, t)$  is approximately proportional to  $x^{(i)} - x$ . Consequently, regressing on  $x^{(i)}$  or on the conditional velocity  $x_1 - x_0$  becomes effectively equivalent. Section 4 investigates how to learn regressing against optimal velocity field  $\hat{u}^*$ , and empirically shows similar results between stochastic and non-stochastic targets.

The regime where flow matching matches stochasticity is mostly concentrated on a very short time interval, for small values of  $t$ . We hypothesize that the phenomenon observed here on the optimal velocity field  $\hat{u}^*$  has major implications on the *learned* flow matching model  $u_\theta$ , which we further inspect in the next section.

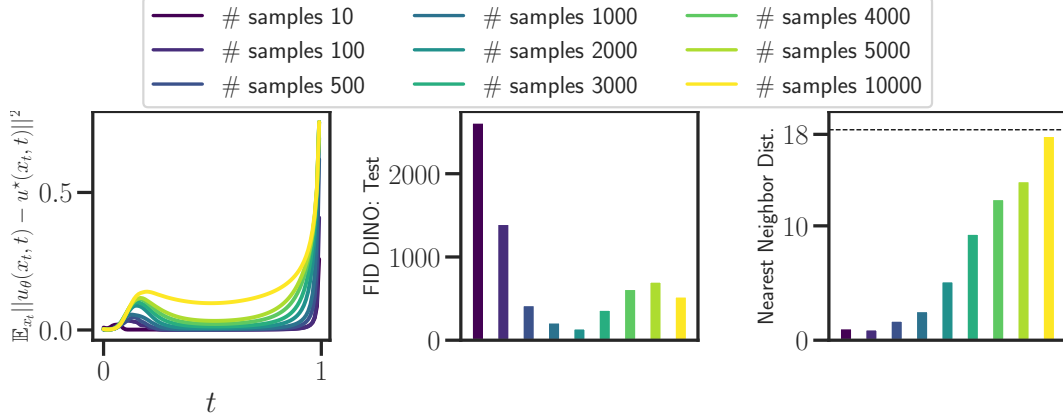

Figure 3: **Failure to learn the optimal velocity field, CIFAR-10.** *Left:* The leftmost figure represents the average error between the optimal empirical velocity field  $\hat{u}^*$  and the learned velocity  $u_\theta$  for multiple values of time  $t$ . *Middle:* The middle figure displays the FID-10k computed on the test dataset, using the DINOv2 embedding. *Right:* The rightmost figure displays the average distance between the generated samples and their closest image from the training set – for reference, the horizontal dashed line indicates the mean distance between an image of CIFAR-10 train and its nearest neighbor in the dataset. All the quantities are computed/learned on a varying number of training samples (10 to  $10^4$ ) of the CIFAR-10 dataset.

### 3.2 Failure to learn the optimal velocity field

This subsection investigates how well the learned velocity field  $u_\theta$  approximates the optimal/ideal velocity field  $\hat{u}^*$ , and how the quality of this approximation correlates with generalization. To do so, we propose the following experiment.

**Set up of Figure 3.** To build Figure 3, we subsampled the CIFAR-10 dataset from 10 to  $10^4$  samples. For each size, we trained a flow matching model using a standard 34 million-parameter U-Net (see Appendix C for details). Following Kadkhodaie et al. (2024), the number of parameters of the network  $u_\theta$  remains fixed across dataset sizes. Importantly, the optimal velocity field  $\hat{u}^*$  itself depends on the dataset size: as the number of samples increases, the complexity of  $\hat{u}^*$  also grows. Thus, we expect the network  $u_\theta$  to accurately approximate the optimal velocity field  $\hat{u}^*$  for smaller dataset sizes.

**Comments on Figure 3.** The leftmost plot shows the average training error

$$\mathbb{E}_{x_0 \sim p_0, x_1 \sim p_{\text{data}}} \|u_\theta(x_t, t) - \hat{u}^*(x_t, t)\|^2, \quad \text{where } x_t := (1-t)x_0 + tx_1,$$

between the learned velocity  $u_\theta$  and the optimal empirical velocity field  $\hat{u}^*$ , evaluated across multiple time values  $t$  and dataset sizes. With only 10 samples (darkest curve), the network  $u_\theta$  closely approximates  $\hat{u}^*$ . As the dataset size increases, the complexity of  $\hat{u}^*$  grows, and the approximation by  $u_\theta$  becomes less accurate. In particular, the approximation fails at two specific time intervals: around  $t \approx 0.15$  and near  $t = 1$ . The failure near  $t = 1$  is expected, as  $\hat{u}^*$  becomes non-Lipschitz at  $t = 1$ . Interestingly, the early-time failure at  $t \approx 0.15$  corresponds to the regime where  $\hat{u}^*$  and  $u^{\text{cond}}$  start to correlate (see Figure 1b in Section 3.1). The middle plot of Figure 3 reports the FID-10k, computed on the test set in the DINOv2 embedding space (Oquab et al., 2024), for various dataset sizes. For a small dataset (e.g., #samples = 10),  $u_\theta$  approximates  $\hat{u}^*$  well but does not generalize – the test FID exceeds  $10^3$ . As the dataset size increases ( $500 \leq \text{\#samples} \leq 3000$ ), the approximation  $u_\theta$  becomes less accurate. Despite this, the model achieves lower FID scores on the test set but still memorizes the training data. The rightmost plot of Figure 3 illustrates this memorization by showing the average distance between each generated sample and its nearest neighbor in the training set. For larger datasets ( $\text{\#samples} \geq 3000$ ), this distance increases substantially, indicating that the model generalizes better. Overall, Figure 3 also suggests that the FID metric can be misleading, even when computed on the test set. For example, the model trained with 1000 samples has a low test FID but memorizes training examples.



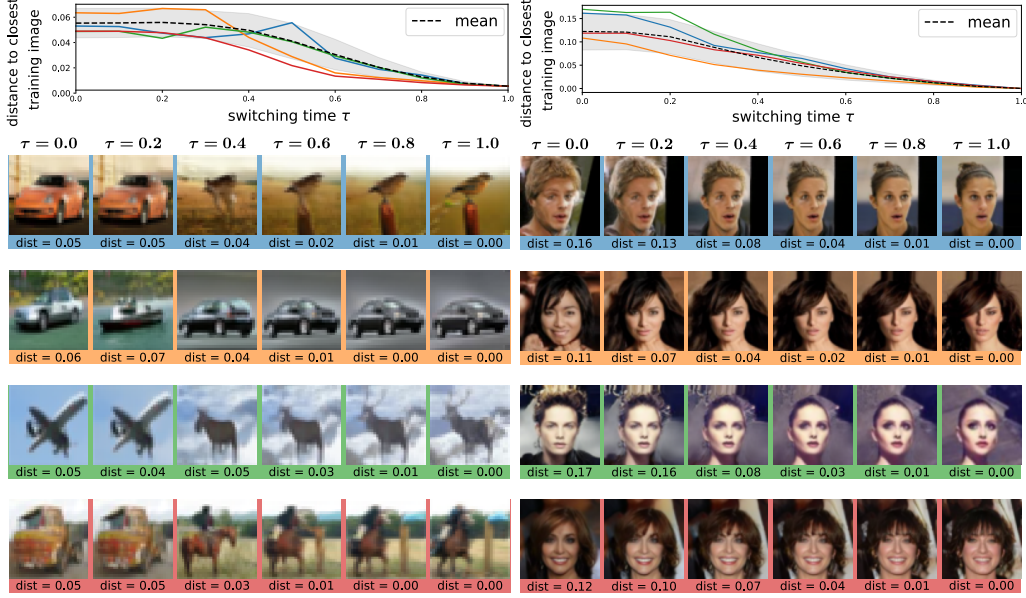

Figure 4: **Generalization occurs at small times on CIFAR-10 (left) and CelebA64 (right).** *Top:* Generalization (distance between generated samples and training data) of hybrid models that follow  $\hat{u}^*$  on  $[0, \tau]$ , then  $u_\theta$  on  $[\tau, 1]$ . The four colored curves correspond to four specific  $x_0$ , the black dashed curve is the mean distance over the 256 generated images. *Bottom:* visualization of generated images for the four different starting noises and various values of  $\tau$  (the background color matching the curve in the top figure). Following  $\hat{u}^*$  until  $\tau \geq 0.3$  yields a model that is not able to generalize.

Figure 3 confirms that generalization arises when the network  $u_\theta$  fails to estimate the optimal velocity field  $\hat{u}^*$ , and that this failure occurs at two specific time intervals. In Section 3.3, we investigate which of these two intervals is responsible for driving generalization.

### 3.3 When does generalization arise?

To investigate whether the failure to approximate  $\hat{u}^*$  matters the most at small or large values of  $t$ , we carry out the following experiment.

**Set up of Figure 4.** We first learn a velocity field  $u_\theta$  using standard conditional flow matching (see Appendix C), then we construct a hybrid model: we define a piecewise trajectory where the flow is governed by the optimal velocity field  $\hat{u}^*$  for times  $t \in [0, \tau]$ , and by the learned velocity field  $u_\theta$  for times  $t \in [\tau, 1]$ , for a given threshold parameter  $\tau \in [0, 1]$ . For the extreme case  $\tau = 1$ , the full trajectory follows  $\hat{u}^*$ , and samples exactly match training data points. Conversely, when  $\tau = 0$ , the entire trajectory is governed by  $u_\theta$ , yielding novel samples. Intermediate values of  $\tau$  produce a mixture of both behaviors, which we interpret as reflecting varying degrees of generalization. To assess generalization, we measure the distance of generated samples to the dataset using the LPIPS metric (Zhang et al., 2018), which computes the feature distance between two images via some pretrained classification network. We define the distance of a generated sample  $x$  to a dataset  $\mathcal{D} = \{x^{(1)}, \dots, x^{(n)}\}$  as  $\text{dist}(x, \mathcal{D}) = \min_{x^{(i)} \in \mathcal{D}} \text{LPIPS}(x, x^{(i)})$ .

We fix a random batch of 256 pure noise images from  $p_0$ . Then, for various threshold values  $\tau$ , we generate 256 images with the hybrid model, always starting from this batch. Finally, we measure the creativity of the hybrid model as the mean of the aforementioned LPIPS distances between the 256 generated samples and the dataset. Figure 4 (top row) displays these distances as  $\tau$  varies, on the CIFAR-10 (left) and CelebA -  $64 \times 64$  (right) datasets. For  $\tau \leq 0.2$ , the hybrid model remains as creative as  $u_\theta$ , despite following  $\hat{u}^*$  in the first steps. For  $\tau > 0.2$ , the LPIPS distance starts dropping. On the displayed generated samples (bottom rows), we in fact see that as soon as  $\tau \geq 0.4$ , the sample generated by the hybrid model is almost the same as the one obtained with  $\hat{u}^*$  ( $\tau = 1$ ). This means that the final image is already determined at  $t = 0.4$  and despite the generalization capacity of  $u_\theta$ ,

following it only after  $t \geq 0.4$  is not enough to create a new image. Hence, *generalization occurs early and cannot be explained by the failure to correctly approximate  $u^*$  at large  $t$ .*

Although we have shown that the stochastic phase was limited to small values of  $t$  in real-data settings, we have not yet definitively ruled it out as the cause of generalization. In the following section, we introduce a learning procedure designed to address this question directly.

## 4 Learning with the closed-form formula

In this section, to discard the impact of stochastic target on the generalization, we propose to directly regress against the closed-form formula (5).

### 4.1 Empirical flow matching

Regressing against the closed-form  $\hat{u}^*$  at a point  $(x_t, t)$  requires evaluating it, *i.e.*, computing a weighted sum of the conditional velocity fields over all the  $n$  training points  $x^{(i)}$ . For a dataset of  $n$  samples of size  $d$ , and a batch of size  $|\mathcal{B}|$ , computing the weights of the exact closed-form formula  $\hat{u}^*(x, t)$  of flow matching requires  $\mathcal{O}(n \times |\mathcal{B}| \times d)$ . These computations are prohibitive since they must be performed for each batch. One natural idea is to rely on a Monte Carlo approximation of the closed-form formula, using  $M$  samples  $b^{(1)}, \dots, b^{(M)}$  to estimate the empirical mean:

$$\mathcal{L}_{\text{EFM}}(\theta) = \mathbb{E}_{\substack{t \sim \mathcal{U}([0,1]) \\ x_0 \sim p_0 \\ x_1 \sim \hat{p}_{\text{data}} \\ x_t = (1-t)x_0 + tx_1 \\ b^{(1)} := x_1; b^{(2)}, \dots, b^{(M)} \sim \hat{p}_{\text{data}}}} \|u_\theta(x_t, t) - \hat{u}_M^*(x_t, t)\|^2, \quad (7)$$

with

$$\hat{u}_M^*(x_t, t) = \sum_{j=1}^M \frac{b^{(j)} - x_t}{1-t} \cdot \left[ \text{softmax} \left( \left( -\frac{\|x_t - tb^{(k)}\|^2}{2(1-t)^2} \right)_{k=1, \dots, M} \right) \right]_j. \quad (8)$$

The formulation in Equation (7) may appear naive at first glance, but it hinges on a crucial trick: the Monte Carlo estimate is computed using a batch that systematically includes the point  $x_1$ , that generated the current  $x_t$ . If instead  $b^{(1)}$  were sampled independently from  $\hat{p}_{\text{data}}$ , this could introduce a sampling bias (see Ryzhakov et al. 2024, Appendix B, and the corresponding OpenReview comments<sup>2</sup> for an in-depth discussion). We show in Section 4.2 that Algorithm 2, aiming to solve Equation (7), brings steady improvements for high-dimensional datasets such as CIFAR-10 and CelebA. Supplementary material (Appendix B) provides further details on the unbiasedness of  $\mathcal{L}_{\text{EFM}}$ . From a computational standpoint, despite the additional sampling of  $M$  samples, Algorithm 2 is much cheaper than multiplying the batch size by  $M$ : the  $M$  samples are simply averaged (with weights) but the backpropagation remains exactly the same as in Algorithm 1.

220

#### Algorithm 1 Vanilla Flow Matching

```

for  $k$  in  $1, \dots, n_{\text{iter}}$  do
   $t \sim \mathcal{U}([0, 1])$ 
   $x_0 \sim \mathcal{N}(0, \text{Id}), x_1 \sim \hat{p}_{\text{data}},$ 
   $x_t = (1-t)x_0 + tx_1$ 
   $u^{\text{cond}}(x_t, t) = x_1 - x_0$ 
   $\mathcal{L}(\theta) = \|u_\theta(x_t, t) - u^{\text{cond}}(x_t, t)\|^2$ 
  Compute  $\nabla \mathcal{L}(\theta)$  and update  $\theta$ 
return  $u_\theta$ 

```

#### Algorithm 2 Empirical Flow Matching

```

param :  $M$  // Number of samples in the empirical mean
for  $k$  in  $1, \dots, n_{\text{iter}}$  do
   $x_0 \sim \mathcal{N}(0, \text{Id}), x_1 \sim \hat{p}_{\text{data}}, t \sim \mathcal{U}([0, 1])$ 
   $x_t = (1-t)x_0 + tx_1$ 
   $b^{(1)} = x_1$ 
   $\forall j \in \llbracket 2, M \rrbracket, b^{(j)} \sim \hat{p}_{\text{data}}$  // Samples from  $\hat{p}_{\text{data}}$ 
   $\hat{u}_M^*(x_t, t) = \sum_{j=1}^M \frac{b^{(j)} - x_t}{1-t} \cdot \left[ \text{softmax} \left( -\frac{\|x_t - tb^{(k)}\|^2}{2(1-t)^2} \right) \right]_j$ 
   $\mathcal{L}(\theta) = \|u_\theta(x_t, t) - \hat{u}_M^*(x_t, t)\|^2$ 
  Compute  $\nabla \mathcal{L}(\theta)$  and update  $\theta$ 
return  $u_\theta$ 

```

<sup>2</sup><https://openreview.net/forum?id=XYDMackWMA>

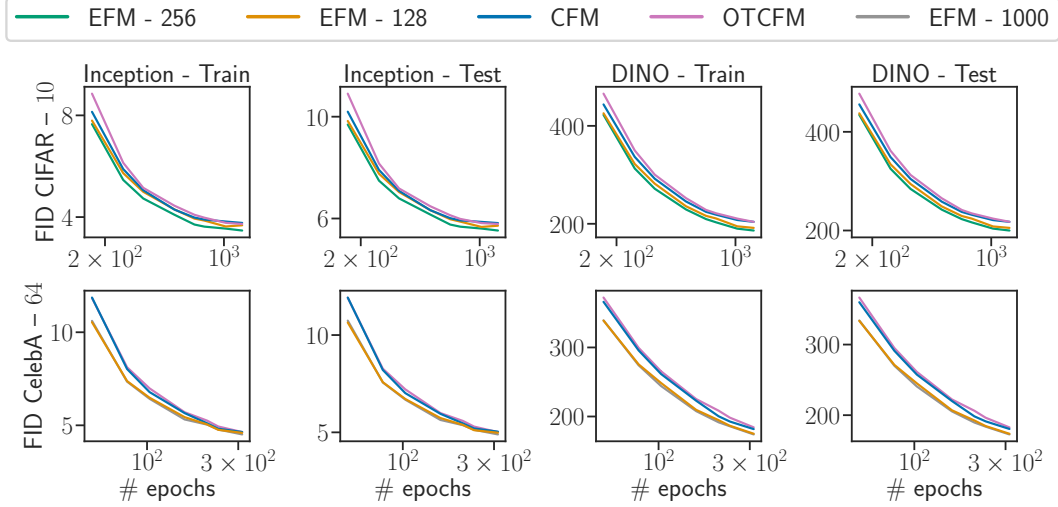

Figure 5: FID computed on the training set (50k) and the test set (10k) using multiple embeddings, Inception and DINOv2. Regressing against a more deterministic target (EFM - 128, 256, 1000) does not yield performance decreases. On the contrary, the more deterministic the target, the better the performance.

## 221 4.2 Experiments

222 We now learn with empirical flow matching (EFM, Equation (7) and Algorithm 2) in practical  
 223 high-dimensional settings. Our goal with this empirical investigation is first to observe if regressing  
 224 against a more deterministic target leads to performance improvement/degradation.

225 **Datasets and Models.** We perform experiments on the image datasets CIFAR-10 (Krizhevsky and  
 226 Hinton, 2009) and CelebA  $64 \times 64$  (Liu et al., 2015). For the experiments, we compare vanilla  
 227 conditional flow matching (Lipman et al., 2023; Liu et al., 2023; Albergo and Vanden-Eijnden,  
 228 2023), optimal transport flow matching (Pooladian et al., 2023; Tong et al., 2024), and the empirical  
 229 flow matching in Algorithm 2, for multiple numbers of samples  $M$  to estimate the empirical mean.  
 230 Training details are in Appendix C.

231 **Metrics.** To assess generalization performance, we use the standard Fréchet Inception Distance  
 232 (Heusel et al., 2017) with Inception-V3 (Szegedy et al., 2016) but we also follow the recommendation  
 233 of Stein et al. (2023) using the DINOv2 embedding (Oquab et al., 2023), which is known to lead to  
 234 a less biased evaluation. Defining and quantifying the generalization ability of generative models  
 235 is overall a challenging task: train and test FID are known to be imperfect (Stein et al., 2023;  
 236 Jiralerspong et al., 2023; Parmar et al., 2022) yet no superior competitor has emerged.

237 **Comments on Figure 5.** Figure 5 compares vanilla flow matching, OTCFM, and the empirical  
 238 flow matching (EFM, Algorithm 2) approaches using various numbers of samples to estimate the  
 239 empirical mean,  $M \in \{128, 256, 1000\}$ . First, we observe that learning with a more deterministic  
 240 target does not degrade either training or testing performance, across both types of embeddings. On  
 241 the contrary, we consistently observe modest but steady improvements as stochasticity is reduced.  
 242 For both CIFAR-10 and CelebA, increasing the number of samples  $M$  used to compute the empirical  
 243 mean—*i.e.*, making the targets less stochastic—leads to more stable improvements. It is worth  
 244 noting that Algorithm 2 has a computational complexity of  $\mathcal{O}(M \times |\mathcal{B}| \times d)$ , where  $|\mathcal{B}|$  is the batch  
 245 size,  $M$  is the number of samples used to estimate the empirical mean, and  $d$  is the sample dimension.  
 246 In our experiments, choosing  $M = |\mathcal{B}| = 128$  yielded a modest time overhead.



## 5 Related work

The existing literature related to our study can be roughly divided into three approaches: leveraging the closed-form, studies on the memorization vs generalization, and characterization of the different phases of the generating dynamics.

**Leveraging the closed-form.** Proposition 1 has been leveraged in several ways. The closest existing work is by Ryzhakov et al. (2024), who propose to regress against  $\hat{u}^*$  as we do in Section 4. Nevertheless, their motivation is that reducing the variance of the velocity field estimation makes learning more accurate: as explained in Section 3.1, we argue this claim rests on misleading 2D-based intuitions (e.g., Figure 1, challenged by Section 3.1). Scarvelis et al. (2025) bypass training, and suggest using a smoothed version of  $\hat{u}^*$  to generate novel samples. In a work specific to images and convolutional neural networks, Kamb and Ganguli (2024) suggested that flow matching indeed ends up learning an optimal velocity, but that instead of memorizing training samples, the velocity memorizes a combination of all possible patches in an image and across the images. They show remarkable agreement between their theory and the trajectories followed by learned vector fields, but their work is limited to convolutional architectures.

**Memorization and reasons for generalization.** Kadkhodaie et al. (2024) directly relates the transition from memorization to generalization to the size of the training dataset, and proposes a geometric interpretation. We provide a complementary experiment in Section 3.2, quantifying how much the network fails to estimate the optimal velocity field. Gu et al. (2025) provide a detailed experimental investigation into the potential causes for generalization, primarily based on the characteristics of the dataset and choices for training and model. Vastola (2025) explores different factors of generalization in the case of diffusion, with a special focus on the stochasticity of the target objective in the learning problem. Through a physic-based modeling of the generative dynamics, they study the covariance matrix of the noisy estimation of the exact score. In our work, we believe that we have shown that this claim was not valid for real high-dimensional data. Niedoba et al. (2024) study the poor approximation of the exact score by the learned models: like Kamb and Ganguli (2024), they suggest that the generalization of the learned models comes from memorization of many patches in the training data.

**Temporal regimes.** Biroli et al. (2024) provide an analysis of the exact score, the counterpart of the exact velocity field for diffusion. For a multimodal target distribution, the authors identify three phases (we keep the convention that  $t = 0$  is noise and  $t = 1$  is target): for  $t < t_1$ , all trajectories are indistinguishable; for  $t_1 < t < t_2$ , trajectories converging to different modes separate; for  $t > t_2$ , trajectories all point to the training dataset. In the case of Gaussians mixtures target, they highlight the dependency of  $t_2$  in the dimension and the number of samples, in  $\mathcal{O}((\log n)/d)$ , meaning that the first phases are observable only if the number of training points is exponential in the dimension. The methodology they adopt to validate the existence of such  $t_2$  on real data relies on the stochasticity of the backward generative process, which does not hold in the case of flow matching. Our experiments on *learned* flow matching models allow us to take this theoretical study on memorization and temporal behaviors of generative processes a step further.

## 6 Conclusion, limitations and broader impact

By challenging the assumption that stochasticity in the loss function is a key driver of generalization, our findings help clarify the role of approximation of the exact velocity field in flow matching models. Beyond the different temporal phases in the generation process that we have identified, we expect further results to be obtained by uncovering new properties of the true velocity field.

As a limitation, we have not precisely characterized the velocity field that ends up being learned, in particular how it behaves outside of the trajectories defined by the optimal velocity. Leveraging existing work on the inductive biases of the architectures at hand seems like a promising venue. Though it connects with many scattered theoretical results in the literature, our methodology is mainly empirical with a focus on learned models used in practice: building on our experimental findings to develop new theoretical foundations is a next step for a broader understanding of generation.

**Broader impact.** We hope that identifying the key factors of generalization will lead to improved training efficiency. However, generative models also raise concerns related to misinformation (notably deepfakes), data privacy, and potential misuse in generating synthetic but realistic content.

## References

- M. S. Albergo and E. Vanden-Eijnden. Building normalizing flows with stochastic interpolants. *ICLR*, 2023.
- G. Biroli, T. Bonnaire, V. de Bortoli, and M. Mézard. Dynamical regimes of diffusion models. *Nature Communications*, 15(1):9957, 2024.
- Z. Borsos, R. Marinier, D. Vincent, E. Kharitonov, O. Pietquin, M. Sharifi, D. Roblek, O. Teboul, D. Grangier, M. Tagliasacchi, et al. Audioldm: a language modeling approach to audio generation. *IEEE/ACM Transactions on Audio, Speech, and Language Processing*, 2023.
- T. Brooks, B. Peebles, C. Holmes, W. DePue, Y. Guo, L. Jing, D. Schnurr, J. Taylor, T. Luhman, E. Luhman, C. Ng, R. Wang, and A. Ramesh. Video generation models as world simulators. 2024. URL <https://openai.com/research/video-generation-models-as-world-simulators>.
- G. Cardoso, S. Samsonov, A. Thin, E. Moulines, and J. Olsson. Br-snis: bias reduced self-normalized importance sampling. *NeurIPS*, 35:716–729, 2022.
- N. Carlini, J. Hayes, M. Nasr, M. Jagielski, V. Sehwag, F. Tramèr, B. Balle, D. Ippolito, and E. Wallace. Extracting training data from diffusion models. In *32nd USENIX Security Symposium (USENIX Security 23)*, pages 5253–5270, 2023.
- G. Casella and C. P. Robert. Rao-blackwellisation of sampling schemes. *Biometrika*, 83(1):81–94, 1996.
- S. U. H. Dar, A. Ghanaat, J. Kahmann, I. Ayy, T. Papavassiliou, S. O. Schoenberg, and S. Engelhardt. Investigating data memorization in 3d latent diffusion models for medical image synthesis. In *International Conference on Medical Image Computing and Computer-Assisted Intervention*, pages 56–65. Springer, 2023.
- A. Gagneux, S. Martin, R. Emonet, Q. Bertrand, and M. Massias. A visual dive into conditional flow matching. In *The Fourth Blogpost Track at ICLR*, 2025.
- W. Gao and M. Li. How do flow matching models memorize and generalize in sample data subspaces? *arXiv preprint arXiv:2410.23594*, 2024.
- S. Gong, M. Li, J. Feng, Z. Wu, and L. Kong. Diffuseq: Sequence to sequence text generation with diffusion models. *ICLR*, 2023.
- X. Gu, C. Du, T. Pang, C. Li, M. Lin, and Y. Wang. On memorization in diffusion models. *TMLR*, 2025.
- M. Heusel, H. Ramsauer, T. Unterthiner, B. Nessler, and S. Hochreiter. Gans trained by a two time-scale update rule converge to a local nash equilibrium. *Advances in neural information processing systems*, 30, 2017.
- J. Ho, A. Jain, and P. Abbeel. Denoising diffusion probabilistic models. *NeurIPS*, 2020a.
- J. Ho, A. Jain, and P. Abbeel. Denoising diffusion probabilistic models. *Advances in neural information processing systems*, 33:6840–6851, 2020b.
- C.-W. Huang, J. H. Lim, and A. C. Courville. A variational perspective on diffusion-based generative models and score matching. *Advances in Neural Information Processing Systems*, 34:22863–22876, 2021.
- M. Jiralerspong, J. Bose, I. Gemp, C. Qin, Y. Bachrach, and G. Gidel. Feature likelihood divergence: evaluating the generalization of generative models using samples. *NeurIPS*, 2023.
- Z. Kadkhodaie, F. Guth, E. P. Simoncelli, and S. Mallat. Generalization in diffusion models arises from geometry-adaptive harmonic representations. *ICLR*, 2024.
- M. Kamb and S. Ganguli. An analytic theory of creativity in convolutional diffusion models. *arXiv preprint arXiv:2412.20292*, 2024.

346 A. Krizhevsky and G. Hinton. Learning multiple layers of features from tiny images. 2009.

347 S. Li, S. Chen, and Q. Li. A good score does not lead to a good generative model. *arXiv preprint*  
348 *arXiv:2401.04856*, 2024.

349 Y. Lipman, R. T. Chen, H. Ben-Hamu, M. Nickel, and M. Le. Flow matching for generative modeling.  
350 *ICLR*, 2023.

351 Y. Lipman, M. Havasi, P. Holderrieth, N. Shaul, M. Le, B. Karrer, R. T. Chen, D. Lopez-Paz,  
352 H. Ben-Hamu, and I. Gat. Flow matching guide and code. *arXiv preprint arXiv:2412.06264*, 2024.

353 X. Liu, C. Gong, and Q. Liu. Flow straight and fast: Learning to generate and transfer data with  
354 rectified flow. *ICLR*, 2023.

355 Z. Liu, P. Luo, X. Wang, and X. Tang. Deep learning face attributes in the wild. In *Proceedings of*  
356 *International Conference on Computer Vision (ICCV)*, December 2015.

357 S. Martin, A. Gagneux, P. Hagemann, and G. Steidl. Pnp-flow: Plug-and-play image restoration with  
358 flow matching. *ICLR*, 2025.

359 A. Q. Nichol and P. Dhariwal. Improved denoising diffusion probabilistic models. In *International*  
360 *conference on machine learning*, pages 8162–8171. PMLR, 2021.

361 M. Niedoba, B. Zwartsenberg, K. Murphy, and F. Wood. Towards a mechanistic explanation of  
362 diffusion model generalization. *arXiv preprint arXiv:2411.19339*, 2024.

363 M. Oquab, T. Darcet, T. Moutakanni, H. Vo, M. Szafraniec, V. Khalidov, P. Fernandez, D. Haziza,  
364 F. Massa, A. El-Nouby, et al. Dinov2: Learning robust visual features without supervision. *arXiv*  
365 *preprint arXiv:2304.07193*, 2023.

366 M. Oquab, T. Darcet, T. Moutakanni, H. V. Vo, M. Szafraniec, V. Khalidov, P. Fernandez, D. Haziza,  
367 F. Massa, A. El-Nouby, R. Howes, P.-Y. Huang, H. Xu, V. Sharma, S.-W. Li, W. Galuba, M. Rabbat,  
368 M. Assran, N. Ballas, G. Synnaeve, I. Misra, H. Jegou, J. Mairal, P. Labatut, A. Joulin, and  
369 P. Bojanowski. Dinov2: Learning robust visual features without supervision. *TMLR*, 2024.

370 A. B. Owen. *Monte Carlo theory, methods and examples*. [https://artowen.su.domains/  
371 mc/](https://artowen.su.domains/mc/), 2013.

372 G. Parmar, R. Zhang, and J.-Y. Zhu. On aliased resizing and surprising subtleties in gan evaluation.  
373 In *CVPR*, 2022.

374 A.-A. Pooladian, H. Ben-Hamu, C. Domingo-Enrich, B. Amos, Y. Lipman, and R. T. Chen. Multi-  
375 sample flow matching: Straightening flows with minibatch couplings. *ICML*, 2023.

376 C. P. Robert, G. Casella, and G. Casella. *Monte Carlo statistical methods*, volume 2. Springer, 1999.

377 B. L. Ross, H. Kamkari, T. Wu, R. Hosseinzadeh, Z. Liu, G. Stein, J. C. Cresswell, and G. Loaiza-  
378 Ganem. A geometric framework for understanding memorization in generative models. *ICLR*,  
379 2025.

380 G. Ryzhakov, S. Pavlova, E. Sevriugov, and I. Oseledets. Explicit flow matching: On the theory of  
381 flow matching algorithms with applications. *arXiv preprint arXiv:2402.03232*, 2024.

382 C. Scarvelis, H. S. B. de Ocáriz, and J. Solomon. Closed-form diffusion models. *TMLR*, 2025.

383 J. Sohl-Dickstein, E. Weiss, N. Maheswaranathan, and S. Ganguli. Deep unsupervised learning using  
384 nonequilibrium thermodynamics. In *ICML*, 2015.

385 G. Somepalli, V. Singla, M. Goldblum, J. Geiping, and T. Goldstein. Understanding and mitigating  
386 copying in diffusion models. *NeurIPS*, 36:47783–47803, 2023a.

387 G. Somepalli, V. Singla, M. Goldblum, J. Geiping, and T. Goldstein. Diffusion art or digital forgery?  
388 investigating data replication in diffusion models. In *Proceedings of the IEEE/CVF conference on*  
389 *computer vision and pattern recognition*, pages 6048–6058, 2023b.

390 Y. Song, J. Sohl-Dickstein, D. P. Kingma, A. Kumar, S. Ermon, and B. Poole. Score-based generative  
391 modeling through stochastic differential equations. *ICLR*, 2021.

392 Stability AI. <https://stability.ai/stablediffusion>, 2023. Accessed: 2023-09-09.

393 G. Stein, J. Cresswell, R. Hosseinzadeh, Y. Sui, B. Ross, V. Villecroze, Z. Liu, A. L. Caterini,  
394 E. Taylor, and G. Loaiza-Ganem. Exposing flaws of generative model evaluation metrics and their  
395 unfair treatment of diffusion models. *NeurIPS*, 36:3732–3784, 2023.

396 C. Szegedy, V. Vanhoucke, S. Ioffe, J. Shlens, and Z. Wojna. Rethinking the inception architecture  
397 for computer vision. In *Proceedings of the IEEE conference on computer vision and pattern  
398 recognition*, pages 2818–2826, 2016.

399 A. Tong, N. Malkin, G. Huguet, Y. Zhang, J. Rector-Brooks, K. Fatras, G. Wolf, and Y. Bengio.  
400 Improving and generalizing flow-based generative models with minibatch optimal transport. In  
401 *TMLR*, 2024. URL <https://openreview.net/forum?id=CD9Snc73AW>.

402 J. J. Vastola. Generalization through variance: how noise shapes inductive biases in diffusion models.  
403 *ICLR*, 2025.

404 R. Villegas, M. Babaeizadeh, P.-J. Kindermans, H. Moraldo, H. Zhang, M. T. Saffar, S. Castro,  
405 J. Kunze, and D. Erhan. Phenaki: Variable length video generation from open domain textual  
406 descriptions. In *ICLR*, 2022.

407 M. Xu, T. Geffner, K. Kreis, W. Nie, Y. Xu, J. Leskovec, S. Ermon, and A. Vahdat. Energy-based  
408 diffusion language models for text generation. *ICLR*, 2025.

409 Y. Xu, S. Tong, and T. Jaakkola. Stable target field for reduced variance score estimation in diffusion  
410 models. *arXiv preprint arXiv:2302.00670*, 2023.

411 T. Yoon, J. Y. Choi, S. Kwon, and E. K. Ryu. Diffusion probabilistic models generalize when they  
412 fail to memorize. In *ICML 2023 workshop on structured probabilistic inference & generative  
413 modeling*, 2023.

414 H. Zhang, J. Zhou, Y. Lu, M. Guo, P. Wang, L. Shen, and Q. Qu. The emergence of reproducibility  
415 and consistency in diffusion models. In *ICML*, 2024.

416 R. Zhang, P. Isola, A. A. Efros, E. Shechtman, and O. Wang. The unreasonable effectiveness of deep  
417 features as a perceptual metric. In *Proceedings of the IEEE conference on computer vision and  
418 pattern recognition*, pages 586–595, 2018.

## NeurIPS Paper Checklist

The checklist is designed to encourage best practices for responsible machine learning research, addressing issues of reproducibility, transparency, research ethics, and societal impact. Do not remove the checklist: **The papers not including the checklist will be desk rejected.** The checklist should follow the references and follow the (optional) supplemental material. The checklist does NOT count towards the page limit.

Please read the checklist guidelines carefully for information on how to answer these questions. For each question in the checklist:

- You should answer [Yes], [No], or [NA].
- [NA] means either that the question is Not Applicable for that particular paper or the relevant information is Not Available.
- Please provide a short (1–2 sentence) justification right after your answer (even for NA).

**The checklist answers are an integral part of your paper submission.** They are visible to the reviewers, area chairs, senior area chairs, and ethics reviewers. You will be asked to also include it (after eventual revisions) with the final version of your paper, and its final version will be published with the paper.

The reviewers of your paper will be asked to use the checklist as one of the factors in their evaluation. While "[Yes]" is generally preferable to "[No]", it is perfectly acceptable to answer "[No]" provided a proper justification is given (e.g., "error bars are not reported because it would be too computationally expensive" or "we were unable to find the license for the dataset we used"). In general, answering "[No]" or "[NA]" is not grounds for rejection. While the questions are phrased in a binary way, we acknowledge that the true answer is often more nuanced, so please just use your best judgment and write a justification to elaborate. All supporting evidence can appear either in the main paper or the supplemental material, provided in appendix. If you answer [Yes] to a question, in the justification please point to the section(s) where related material for the question can be found.

IMPORTANT, please:

- Delete this instruction block, but keep the section heading "NeurIPS Paper Checklist",
- Keep the checklist subsection headings, questions/answers and guidelines below.
- Do not modify the questions and only use the provided macros for your answers.

### 1. Claims

Question: Do the main claims made in the abstract and introduction accurately reflect the paper's contributions and scope?

Answer: [Yes]

Justification: each claim of the abstract refers to a specific subsection of the paper, that provide empirical evidence of the claim.

Guidelines:

- The answer NA means that the abstract and introduction do not include the claims made in the paper.
- The abstract and/or introduction should clearly state the claims made, including the contributions made in the paper and important assumptions and limitations. A No or NA answer to this question will not be perceived well by the reviewers.
- The claims made should match theoretical and experimental results, and reflect how much the results can be expected to generalize to other settings.
- It is fine to include aspirational goals as motivation as long as it is clear that these goals are not attained by the paper.

### 2. Limitations

Question: Does the paper discuss the limitations of the work performed by the authors?

Answer: [Yes]

Justification: We do have a specific section for the limitation of our work

Guidelines:

- The answer NA means that the paper has no limitation while the answer No means that the paper has limitations, but those are not discussed in the paper.
- The authors are encouraged to create a separate "Limitations" section in their paper.
- The paper should point out any strong assumptions and how robust the results are to violations of these assumptions (e.g., independence assumptions, noiseless settings, model well-specification, asymptotic approximations only holding locally). The authors should reflect on how these assumptions might be violated in practice and what the implications would be.
- The authors should reflect on the scope of the claims made, e.g., if the approach was only tested on a few datasets or with a few runs. In general, empirical results often depend on implicit assumptions, which should be articulated.
- The authors should reflect on the factors that influence the performance of the approach. For example, a facial recognition algorithm may perform poorly when image resolution is low or images are taken in low lighting. Or a speech-to-text system might not be used reliably to provide closed captions for online lectures because it fails to handle technical jargon.
- The authors should discuss the computational efficiency of the proposed algorithms and how they scale with dataset size.
- If applicable, the authors should discuss possible limitations of their approach to address problems of privacy and fairness.
- While the authors might fear that complete honesty about limitations might be used by reviewers as grounds for rejection, a worse outcome might be that reviewers discover limitations that aren't acknowledged in the paper. The authors should use their best judgment and recognize that individual actions in favor of transparency play an important role in developing norms that preserve the integrity of the community. Reviewers will be specifically instructed to not penalize honesty concerning limitations.

### 3. Theory assumptions and proofs

Question: For each theoretical result, does the paper provide the full set of assumptions and a complete (and correct) proof?

Answer: [NA]

Justification: There are no theoretical results

Guidelines:

- The answer NA means that the paper does not include theoretical results.
- All the theorems, formulas, and proofs in the paper should be numbered and cross-referenced.
- All assumptions should be clearly stated or referenced in the statement of any theorems.
- The proofs can either appear in the main paper or the supplemental material, but if they appear in the supplemental material, the authors are encouraged to provide a short proof sketch to provide intuition.
- Inversely, any informal proof provided in the core of the paper should be complemented by formal proofs provided in appendix or supplemental material.
- Theorems and Lemmas that the proof relies upon should be properly referenced.

### 4. Experimental result reproducibility

Question: Does the paper fully disclose all the information needed to reproduce the main experimental results of the paper to the extent that it affects the main claims and/or conclusions of the paper (regardless of whether the code and data are provided or not)?

Answer: [Yes]

Justification: We provided as many details as possible in order to reproduce the results, in particular, we refer to the public implementation we used, including the specific (default) parameters used.

Guidelines:

- The answer NA means that the paper does not include experiments.
- If the paper includes experiments, a No answer to this question will not be perceived well by the reviewers: Making the paper reproducible is important, regardless of whether the code and data are provided or not.
- If the contribution is a dataset and/or model, the authors should describe the steps taken to make their results reproducible or verifiable.
- Depending on the contribution, reproducibility can be accomplished in various ways. For example, if the contribution is a novel architecture, describing the architecture fully might



suffice, or if the contribution is a specific model and empirical evaluation, it may be necessary to either make it possible for others to replicate the model with the same dataset, or provide access to the model. In general, releasing code and data is often one good way to accomplish this, but reproducibility can also be provided via detailed instructions for how to replicate the results, access to a hosted model (e.g., in the case of a large language model), releasing of a model checkpoint, or other means that are appropriate to the research performed.

- While NeurIPS does not require releasing code, the conference does require all submissions to provide some reasonable avenue for reproducibility, which may depend on the nature of the contribution. For example
  - (a) If the contribution is primarily a new algorithm, the paper should make it clear how to reproduce that algorithm.
  - (b) If the contribution is primarily a new model architecture, the paper should describe the architecture clearly and fully.
  - (c) If the contribution is a new model (e.g., a large language model), then there should either be a way to access this model for reproducing the results or a way to reproduce the model (e.g., with an open-source dataset or instructions for how to construct the dataset).
  - (d) We recognize that reproducibility may be tricky in some cases, in which case authors are welcome to describe the particular way they provide for reproducibility. In the case of closed-source models, it may be that access to the model is limited in some way (e.g., to registered users), but it should be possible for other researchers to have some path to reproducing or verifying the results.

## 5. Open access to data and code

Question: Does the paper provide open access to the data and code, with sufficient instructions to faithfully reproduce the main experimental results, as described in supplemental material?

Answer: [No]

Justification: Code will be made available along with publication

Guidelines:

- The answer NA means that paper does not include experiments requiring code.
- Please see the NeurIPS code and data submission guidelines (<https://nips.cc/public/guides/CodeSubmissionPolicy>) for more details.
- While we encourage the release of code and data, we understand that this might not be possible, so “No” is an acceptable answer. Papers cannot be rejected simply for not including code, unless this is central to the contribution (e.g., for a new open-source benchmark).
- The instructions should contain the exact command and environment needed to run to reproduce the results. See the NeurIPS code and data submission guidelines (<https://nips.cc/public/guides/CodeSubmissionPolicy>) for more details.
- The authors should provide instructions on data access and preparation, including how to access the raw data, preprocessed data, intermediate data, and generated data, etc.
- The authors should provide scripts to reproduce all experimental results for the new proposed method and baselines. If only a subset of experiments are reproducible, they should state which ones are omitted from the script and why.
- At submission time, to preserve anonymity, the authors should release anonymized versions (if applicable).
- Providing as much information as possible in supplemental material (appended to the paper) is recommended, but including URLs to data and code is permitted.

## 6. Experimental setting/details

Question: Does the paper specify all the training and test details (e.g., data splits, hyperparameters, how they were chosen, type of optimizer, etc.) necessary to understand the results?

Answer: [Yes]

Justification: We provide a specific appendix with the experimental details

Guidelines:

- The answer NA means that the paper does not include experiments.
- The experimental setting should be presented in the core of the paper to a level of detail that is necessary to appreciate the results and make sense of them.
- The full details can be provided either with the code, in appendix, or as supplemental material.

579 **7. Experiment statistical significance**

580 Question: Does the paper report error bars suitably and correctly defined or other appropriate  
581 information about the statistical significance of the experiments?

582 Answer: [Yes]

583 Justification: We do not report error bars, however, we do specify the number of samples used for  
584 the FID computation and highlight the strong weaknesses of the FID metric.

585 Guidelines:

- 586 • The answer NA means that the paper does not include experiments.
- 587 • The authors should answer "Yes" if the results are accompanied by error bars, confidence  
588 intervals, or statistical significance tests, at least for the experiments that support the main claims  
589 of the paper.
- 590 • The factors of variability that the error bars are capturing should be clearly stated (for example,  
591 train/test split, initialization, random drawing of some parameter, or overall run with given  
592 experimental conditions).
- 593 • The method for calculating the error bars should be explained (closed form formula, call to a  
594 library function, bootstrap, etc.)
- 595 • The assumptions made should be given (e.g., Normally distributed errors).
- 596 • It should be clear whether the error bar is the standard deviation or the standard error of the  
597 mean.
- 598 • It is OK to report 1-sigma error bars, but one should state it. The authors should preferably  
599 report a 2-sigma error bar than state that they have a 96% CI, if the hypothesis of Normality of  
600 errors is not verified.
- 601 • For asymmetric distributions, the authors should be careful not to show in tables or figures  
602 symmetric error bars that would yield results that are out of range (e.g. negative error rates).
- 603 • If error bars are reported in tables or plots, The authors should explain in the text how they were  
604 calculated and reference the corresponding figures or tables in the text.

605 **8. Experiments compute resources**

606 Question: For each experiment, does the paper provide sufficient information on the computer  
607 resources (type of compute workers, memory, time of execution) needed to reproduce the experi-  
608 ments?

609 Answer: [Yes]

610 Justification: we specified what type of GPU we used

611 Guidelines:

- 612 • The answer NA means that the paper does not include experiments.
- 613 • The paper should indicate the type of compute workers CPU or GPU, internal cluster, or cloud  
614 provider, including relevant memory and storage.
- 615 • The paper should provide the amount of compute required for each of the individual experimental  
616 runs as well as estimate the total compute.
- 617 • The paper should disclose whether the full research project required more compute than the  
618 experiments reported in the paper (e.g., preliminary or failed experiments that didn't make it  
619 into the paper).

620 **9. Code of ethics**

621 Question: Does the research conducted in the paper conform, in every respect, with the NeurIPS  
622 Code of Ethics <https://neurips.cc/public/EthicsGuidelines>?

623 Answer: [Yes]

624 Justification: [NA]

625 Guidelines:

- 626 • The answer NA means that the authors have not reviewed the NeurIPS Code of Ethics.
- 627 • If the authors answer No, they should explain the special circumstances that require a deviation  
628 from the Code of Ethics.
- 629 • The authors should make sure to preserve anonymity (e.g., if there is a special consideration due  
630 to laws or regulations in their jurisdiction).

631 **10. Broader impacts**

632 Question: Does the paper discuss both potential positive societal impacts and negative societal  
633 impacts of the work performed?

634 Answer: [Yes]

635 Justification: there is a dedicated broader impact section

636 Guidelines:

- 637 • The answer NA means that there is no societal impact of the work performed.
- 638 • If the authors answer NA or No, they should explain why their work has no societal impact or  
639 why the paper does not address societal impact.
- 640 • Examples of negative societal impacts include potential malicious or unintended uses (e.g.,  
641 disinformation, generating fake profiles, surveillance), fairness considerations (e.g., deploy-  
642 ment of technologies that could make decisions that unfairly impact specific groups), privacy  
643 considerations, and security considerations.
- 644 • The conference expects that many papers will be foundational research and not tied to par-  
645 ticular applications, let alone deployments. However, if there is a direct path to any negative  
646 applications, the authors should point it out. For example, it is legitimate to point out that  
647 an improvement in the quality of generative models could be used to generate deepfakes for  
648 disinformation. On the other hand, it is not needed to point out that a generic algorithm for  
649 optimizing neural networks could enable people to train models that generate Deepfakes faster.
- 650 • The authors should consider possible harms that could arise when the technology is being used  
651 as intended and functioning correctly, harms that could arise when the technology is being used  
652 as intended but gives incorrect results, and harms following from (intentional or unintentional)  
653 misuse of the technology.
- 654 • If there are negative societal impacts, the authors could also discuss possible mitigation strategies  
655 (e.g., gated release of models, providing defenses in addition to attacks, mechanisms for  
656 monitoring misuse, mechanisms to monitor how a system learns from feedback over time,  
657 improving the efficiency and accessibility of ML).

## 658 11. Safeguards

659 Question: Does the paper describe safeguards that have been put in place for responsible release of  
660 data or models that have a high risk for misuse (e.g., pretrained language models, image generators,  
661 or scraped datasets)?

662 Answer: [No]

663 Justification: We work on standard image datasets

664 Guidelines:

- 665 • The answer NA means that the paper poses no such risks.
- 666 • Released models that have a high risk for misuse or dual-use should be released with necessary  
667 safeguards to allow for controlled use of the model, for example by requiring that users adhere  
668 to usage guidelines or restrictions to access the model or implementing safety filters.
- 669 • Datasets that have been scraped from the Internet could pose safety risks. The authors should  
670 describe how they avoided releasing unsafe images.
- 671 • We recognize that providing effective safeguards is challenging, and many papers do not require  
672 this, but we encourage authors to take this into account and make a best faith effort.

## 673 12. Licenses for existing assets

674 Question: Are the creators or original owners of assets (e.g., code, data, models), used in the  
675 paper, properly credited and are the license and terms of use explicitly mentioned and properly  
676 respected?

677 Answer: [Yes]

678 Justification: We properly refer the `torchcfm` and `PnPflow` codebase.

679 Guidelines:

- 680 • The answer NA means that the paper does not use existing assets.
- 681 • The authors should cite the original paper that produced the code package or dataset.
- 682 • The authors should state which version of the asset is used and, if possible, include a URL.
- 683 • The name of the license (e.g., CC-BY 4.0) should be included for each asset.
- 684 • For scraped data from a particular source (e.g., website), the copyright and terms of service of  
685 that source should be provided.

- If assets are released, the license, copyright information, and terms of use in the package should be provided. For popular datasets, [paperswithcode.com/datasets](https://paperswithcode.com/datasets) has curated licenses for some datasets. Their licensing guide can help determine the license of a dataset.
- For existing datasets that are re-packaged, both the original license and the license of the derived asset (if it has changed) should be provided.
- If this information is not available online, the authors are encouraged to reach out to the asset's creators.

### 13. New assets

Question: Are new assets introduced in the paper well documented and is the documentation provided alongside the assets?

Answer: [NA]

Justification: [NA]

Guidelines:

- The answer NA means that the paper does not release new assets.
- Researchers should communicate the details of the dataset/code/model as part of their submissions via structured templates. This includes details about training, license, limitations, etc.
- The paper should discuss whether and how consent was obtained from people whose asset is used.
- At submission time, remember to anonymize your assets (if applicable). You can either create an anonymized URL or include an anonymized zip file.

### 14. Crowdsourcing and research with human subjects

Question: For crowdsourcing experiments and research with human subjects, does the paper include the full text of instructions given to participants and screenshots, if applicable, as well as details about compensation (if any)?

Answer: [NA]

Justification: [NA]

Guidelines:

- The answer NA means that the paper does not involve crowdsourcing nor research with human subjects.
- Including this information in the supplemental material is fine, but if the main contribution of the paper involves human subjects, then as much detail as possible should be included in the main paper.
- According to the NeurIPS Code of Ethics, workers involved in data collection, curation, or other labor should be paid at least the minimum wage in the country of the data collector.

### 15. Institutional review board (IRB) approvals or equivalent for research with human subjects

Question: Does the paper describe potential risks incurred by study participants, whether such risks were disclosed to the subjects, and whether Institutional Review Board (IRB) approvals (or an equivalent approval/review based on the requirements of your country or institution) were obtained?

Answer: [NA]

Justification: [NA]

Guidelines:

- The answer NA means that the paper does not involve crowdsourcing nor research with human subjects.
- Depending on the country in which research is conducted, IRB approval (or equivalent) may be required for any human subjects research. If you obtained IRB approval, you should clearly state this in the paper.
- We recognize that the procedures for this may vary significantly between institutions and locations, and we expect authors to adhere to the NeurIPS Code of Ethics and the guidelines for their institution.
- For initial submissions, do not include any information that would break anonymity (if applicable), such as the institution conducting the review.

739 **16. Declaration of LLM usage**

740 Question: Does the paper describe the usage of LLMs if it is an important, original, or non-  
741 standard component of the core methods in this research? Note that if the LLM is used only for  
742 writing, editing, or formatting purposes and does not impact the core methodology, scientific  
743 rigorousness, or originality of the research, declaration is not required.

744 Answer: [No]

745 Justification: LLMs were only used for grammatical purposes.

746 Guidelines:

- 747 • The answer NA means that the core method development in this research does not involve LLMs  
748 as any important, original, or non-standard components.
- 749 • Please refer to our LLM policy (<https://neurips.cc/Conferences/2025/LLM>) for  
750 what should or should not be described.

751 **A Proofs of Section 2**

752 **A.1 Proof of Proposition 1**

753 *Proof.* • In the case where  $z \sim \hat{p}_{\text{data}}$ , conditional probability writes

$$p(z = x^{(i)}|x, t) = \frac{p(x, t, z = x^{(i)})}{p(x, t)} \quad (9)$$

$$= \frac{p(x|t, z = x^{(i)})p(t, z = x^{(i)})}{p(x, t)} \quad (10)$$

$$= \frac{p(x|t, z = x^{(i)})p(t, z = x^{(i)})}{\sum_{i'=1}^n p(x, t, z = x^{(i')})} \quad (11)$$

$$= \frac{p(x|t, z = x^{(i)})p(t) \overbrace{p(z = x^{(i)})}^{\frac{1}{n}}}{\sum_{i'=1}^n p(x|t, z = x^{(i')})p(t) \underbrace{p(z = x^{(i')})}_{\frac{1}{n}}} \quad (12)$$

$$= \frac{p(x|t, z = x^{(i)})}{\sum_{i'=1}^n p(x|t, z = x^{(i')})} . \quad (13)$$

754 Plugging Equation (13) in Equation (2) yields the closed-form formula for the velocity field:

$$u^*(x, t) = \sum_{i=1}^n u^{\text{cond}}(x, t, z = x^{(i)})p(z = x^{(i)}|x, t) \quad (14)$$

$$= \sum_{i=1}^n u^{\text{cond}}(x, t, z = x^{(i)}) \frac{p(x|t, z = x^{(i)})}{\sum_{i'=1}^n p(x|t, z = x^{(i')})} . \quad (15)$$

755 which proves Equation (5); using that  $x|t, z = x^{(i)} \sim \mathcal{N}(tx^{(i)}, (1-t)^2 \text{Id})$  and  $u^{\text{cond}}(x, t, z =$   
 756  $x^{(i)}) = \frac{x^{(i)} - x}{1-t}$  yields Equation (6).

757 • For the case  $z \sim p_0 \times \hat{p}_{\text{data}}$ ,

$$\hat{u}^*(x, t) := \int_z u^{\text{cond}}(x, t, z)p(z|x, t) \, dz \quad (16)$$

$$= \int_z u^{\text{cond}}(x, t, z) \frac{p(x, z, t)}{p(x, t)} \, dz \quad (17)$$

$$= \int_z u^{\text{cond}}(x, t, z) \frac{p(x|z, t)p(z)p(t)}{\int_{z'} p(x|t, z')p(t)p(z') \, dz'} \, dz \quad (18)$$

$$= \int_z u^{\text{cond}}(x, t, z) \frac{p(x|z, t)p(z)}{\int_{z'} p(x|t, z')p(z') \, dz'} \, dz \quad (19)$$

758 Now for the denominator, since  $z \sim p_0 \times \hat{p}_{\text{data}}$ :

$$\int_{z'} p(x|t, z')p(z') \, dz' = \int_{x_0} \sum_{i=1}^n \delta_{(1-t)x_0 + tx^{(i)}}(x) \frac{1}{\sqrt{2\pi}} \exp(-\frac{1}{2}x_0^2) dx_0 \quad (20)$$

$$= \sum_{i=1}^n \frac{1}{\sqrt{2\pi}} \exp\left(-\frac{1}{2(1-t)^2}(x - tx^{(i)})^2\right) \quad (21)$$

759 since  $\delta_{(1-t)x_0 + tx^{(i)}}(x)$  imposes  $x = (1-t)x_0 + tx^{(i)}$ , meaning  $x_0 = \frac{x - tx^{(i)}}{1-t}$ .



Equivalently, the Dirac imposes  $x^{(i)} - x_0 = \frac{x^{(i)} - x}{1-t}$ , hence for the numerator:

$$\int_z u^{\text{cond}}(x, t, z) p(x|z, t) p(z) dz \int_{x_0} \sum_{i=1}^n (x^{(i)} - x_0) \delta_{(1-t)x_0 + tx^{(i)}}(x) \frac{1}{\sqrt{2\pi}} \exp\left(-\frac{1}{2}\|x_0\|^2\right) dx_0 \quad (22)$$

$$= \sum_{i=1}^n \frac{x^{(i)} - x}{1-t} \frac{1}{\sqrt{2\pi}} \exp\left(-\frac{1}{2(1-t)^2}\|x - tx^{(i)}\|^2\right) \quad (23)$$

Taking the ratio of Equations (21) and (23) concludes the proof.  $\square$

## B Additional details and comments on empirical flow matching

First, recalls on the optimal velocity (Equation (6)) and the empirical flow matching loss (Equations (7) and (8)) are provided in Appendix B.1. The unbiasedness of the estimator is presented in Appendix B.2, and its proof is in Appendix B.3.

### B.1 Recalls

The closed-form formula of the "optimal" velocity field is:

$$\hat{u}^*(x, t) = \sum_{l=1}^n \frac{x^{(l)} - x}{1-t} \cdot \left[ \text{softmax} \left( \left( -\frac{\|x - tx^{(k)}\|^2}{2(1-t)^2} \right)_{k=1, \dots, n} \right) \right]_l \quad (6)$$

The proposed loss uses mini-batches of size  $M$  (instead of all  $n$  training points) to build an estimator  $\hat{u}_M^*$  of  $\hat{u}^*$ :

$$\mathcal{L}_{\text{EFM}}(\theta) = \mathbb{E}_{\substack{t \sim \mathcal{U}([0,1]) \\ x_0 \sim p_0 \\ x_1 \sim \hat{p}_{\text{data}} \\ x_t = (1-t)x_0 + tx_1 \\ b^{(1)} := x_1; b^{(2)}, \dots, b^{(M)} \sim \hat{p}_{\text{data}}}} \|u_\theta(x_t, t) - \hat{u}_M^*(x_t, t)\|^2, \quad (7)$$

with

$$\hat{u}_M^*(x_t, t) = \sum_{j=1}^M \frac{b^{(j)} - x_t}{1-t} \cdot \left[ \text{softmax} \left( \left( -\frac{\|x_t - tb^{(k)}\|^2}{2(1-t)^2} \right)_{k=1, \dots, M} \right) \right]_j \quad (8)$$

Crucially, in Equation (7) the sample  $b^{(1)}$  depends on  $x_t$  and is reused in the estimate  $\hat{u}_M^*$ . This important detail yields an unbiased estimator of  $\hat{u}^*$ .

### B.2 Theoretical properties of the proposed estimator

**Proposition 2.** Let  $\hat{p}_{\text{data}}(z|x, t)$  denote  $p(z|x, t)$ , meaning a probability distribution on  $\{x^{(i)}\}_{i=1}^n$ , with expression given by Equation (13). With no constraints on the learned velocity field  $u_\theta$ ,

i) The minimizer of Equation (7) writes, for all  $(x, t)$

$$\mathbb{E}_{b^{(1)} \sim \hat{p}_{\text{data}}(\cdot|x, t); b^{(2)}, \dots, b^{(M)} \sim \hat{p}_{\text{data}}} [\hat{u}_M^*(x, t)] \quad (24)$$

ii) In addition, for all  $(x, t)$ , the minimizer of Equation (7) equals the optimal velocity field, i.e.,

$$\mathbb{E}_{b^{(1)} \sim \hat{p}_{\text{data}}(\cdot|x, t); b^{(2)}, \dots, b^{(M)} \sim \hat{p}_{\text{data}}} [\hat{u}_M^*(x, t)] = \hat{u}^*(x, t) \quad (25)$$

iii) The conditional variance of the estimator  $\hat{u}_M^*$  is smaller than the usual conditional variance:

$$\text{Var}_{b^{(1)} \sim \hat{p}_{\text{data}}(\cdot|x, t); b^{(2)}, \dots, b^{(M)} \sim \hat{p}_{\text{data}}} [\hat{u}_M^*(x, t)] \leq \text{Var}_{b^{(1)} \sim \hat{p}_{\text{data}}(\cdot|x, t)} [u^{\text{cond}}(x, b^{(1)}, t)] \quad (26)$$

778 The proof of Proposition 2 can be found in Appendix B.3. First, we discuss below the relation  
779 between Proposition 2 and the sampling literature.

780 **Links with importance sampling.** The estimator  $\hat{u}^*$  in Equation (6) can be seen as a form of  
781 *importance sampling* (see Robert et al. 1999, Chap. 3 for an in-depth reference). In a nutshell,  
782 importance sampling is a way to estimate an expectation when one cannot easily sample from the  
783 random variable it depends on. More precisely, in the ideal case  $z \sim p_{\text{data}}$  (as opposed to  $z \sim \hat{p}_{\text{data}}$ ),  
784 the velocity field formula is the following

$$u^*(x_t, t) = \mathbb{E}_{z|x_t, t} [u^{\text{cond}}(x_t, z, t)] \quad (27)$$

$$= \int_z u^{\text{cond}}(x_t, z, t) p(z|x_t, t) dz \quad (28)$$

785 When  $z \sim p_{\text{data}}$ , it is difficult to sample from  $z|x_t, t$ , but the latter equation can be rewritten as

$$u^*(x_t, t) = \int_z u^{\text{cond}}(x_t, z, t) \frac{p(z|x_t, t)}{p(z)} p(z) dz \quad (29)$$

786 and one can easily sample from  $z \sim \hat{p}_{\text{data}}$  using the empirical data distribution  $x^{(1)}, \dots, x^{(n)}$

$$u^*(x_t, t) \approx \frac{1}{n} \sum_{i=1}^n u^{\text{cond}}(x_t, x^{(i)}, t) \frac{p(z = x^{(i)}|x_t, t)}{p(x^{(i)})} \quad (30)$$

$$= \sum_{i=1}^n u^{\text{cond}}(x_t, x^{(i)}, t) p(z = x^{(i)}|x_t, t) \quad (31)$$

$$:= \hat{u}^*(x_t, t) \quad (32)$$

787 **Links with self-normalized importance sampling.** The estimator  $\hat{u}_M^*$  in Equation (8) draws  
788 strong connections with self-normalized importance sampling (see Owen 2013, Chap. 9.2), and  
789 Rao-Blackwelled estimators (Casella and Robert, 1996; Cardoso et al., 2022). Very importantly,  
790 as discussed in Ryzhakov et al. (2024), self-normalized important sampling estimators are usually  
791 biased, in the sense that in general:

$$\mathbb{E}_{b^{(1)}, \dots, b^{(M)} \sim \hat{p}_{\text{data}}} \hat{u}_M^*(x_t, t) \neq u^*(x_t, t) \quad (33)$$

792 A crucial point is that our estimator includes  $b^{(1)} \sim \hat{p}_{\text{data}}(\cdot|x_t, t)$ , which yields the main result of  
793 Proposition 2

$$\mathbb{E}_{b^{(1)} \sim \hat{p}_{\text{data}}(\cdot|x_t, t), b^{(2)}, \dots, b^{(M)} \sim p_{\text{data}}} [\hat{u}_M^*(x_t, t)] = u^*(x_t, t) \quad (34)$$

794 Finally, this idea of regressing against a more deterministic target derived from the optimal closed-  
795 form velocity field has also been empirically explored for diffusion models (Xu et al., 2023).

### 796 B.3 Proof of Proposition 2

797 *Proof of Item (i).* With no constraints on  $u_\theta$ , the empirical flow matching loss writes:

$$\mathbb{E}_{\substack{t \sim \mathcal{U}([0,1]) \\ x_1 \sim \hat{p}_{\text{data}} \\ x_t = (1-t)x_0 + tx_1 \\ b^{(1)} := x_1; b^{(2)}, \dots, b^{(M)} \sim \hat{p}_{\text{data}}}} \|u_\theta(x_t, t) - \hat{u}_M^*(x_t, t)\|^2, \quad (35)$$

$$= \mathbb{E}_{\substack{t \sim \mathcal{U}([0,1]) \\ x_t \sim p_t}} \mathbb{E}_{\substack{b^{(1)} \sim \hat{p}_{\text{data}}(\cdot|x_t, t) \\ b^{(2)}, \dots, b^{(M)}|x_t, t}} \|u_\theta(x_t, t) - \hat{u}_M^*(x_t, t)\|^2, \quad (36)$$

$$= \mathbb{E}_{\substack{t \sim \mathcal{U}([0,1]) \\ x_t \sim p_t}} \mathbb{E}_{\substack{b^{(1)} := \hat{p}_{\text{data}}(\cdot|x_t, t) \\ b^{(2)}, \dots, b^{(M)} \sim \hat{p}_{\text{data}}}} \|u_\theta(x_t, t) - \hat{u}_M^*(x_t, t)\|^2 \text{ because } b^{(2)}, \dots, b^{(M)} \perp\!\!\!\perp x_t, t, \quad (37)$$

798 which is minimized when for all  $x_t, t$

$$u_\theta(x_t, t) = \mathbb{E}_{\substack{b^{(1)} \sim \hat{p}_{\text{data}}(\cdot|x_t, t) \\ b^{(2)}, \dots, b^{(M)} \sim \hat{p}_{\text{data}}}} [\hat{u}_M^*(x_t, t)] \quad (38)$$

799

□

800 *Proof of Item (ii).* The minimizer for a given  $(x_t, t)$ , removing these elements from the notation for  
 801 conciseness and abstraction, is a weighted mean:

$$\hat{u}^*(x_t, t) = \hat{u}^* = \sum_{l=1}^n w^{(l)} u^{(l)} \quad , \quad \text{with} \quad (39)$$

$$w^{(l)} = \hat{p}_{\text{data}}(z = x^{(l)} | t, x_t) \quad , \quad \sum_{l=1}^n w^{(l)} = 1 \quad (40)$$

$$u^{(l)} = u^{\text{cond}}(x_t, x^{(l)}, t) \quad (41)$$

802 We express a mini-batch as an  $M$ -valued vector of indices,  $\mathbf{i} \in \llbracket 1, n \rrbracket^M$ . The mini-batch estimate  
 803 from Equation (7), considering the definition of the softmax, can be expressed as a mini-batch  
 804 weighted-mean:

$$\hat{u}_M^*(\mathbf{i}) = \frac{\sum_{j=1}^M w^{(\mathbf{i}_j)} u^{(\mathbf{i}_j)}}{\sum_{j=1}^M w^{(\mathbf{i}_j)}} \quad (42)$$

805 The categorical distribution over  $\llbracket 1, n \rrbracket$  with probabilities following the weights  $w$  in (40) is denoted  
 806  $\text{Cat}(w)$  and the uniform distribution, *i.e.*,  $\text{Cat}(\mathbf{1}/n)$ , is denoted  $\text{Unif}$ .

807 The main result of the following is that, in expectation over the biased-mini-batches, **where the first**  
 808 **point is drawn according to**  $w$  and the  $M - 1$  other points are drawn uniformly, the mini-batch  
 809 weighted-mean is an unbiased estimate of the  $w$ -weighted-mean  $\hat{u}^*$ .

$$\mathbb{E} [\hat{u}_M^*(\mathbf{i})] := \mathbb{E}_{\mathbf{i}_1 \sim \text{Cat}(w)} \mathbb{E}_{\mathbf{i}_2, \dots, \mathbf{i}_M \sim \text{Unif}} [\hat{u}_M^*(\mathbf{i})] \quad (43)$$

$$= \sum_{\mathbf{i}_1=1}^n w^{(\mathbf{i}_1)} \mathbb{E}_{\mathbf{i}_2, \dots, \mathbf{i}_M \sim \text{Unif}} [\hat{u}_M^*(\mathbf{i})] \quad (44)$$

$$= \sum_{\mathbf{i}_1=1}^n \mathbb{E}_{\mathbf{i}_2, \dots, \mathbf{i}_M \sim \text{Unif}} [w^{(\mathbf{i}_1)} \hat{u}_M^*(\mathbf{i})] \quad (45)$$

$$= n \sum_{\mathbf{i}_1=1}^n \frac{1}{n} \mathbb{E}_{\mathbf{i}_2, \dots, \mathbf{i}_M \sim \text{Unif}} [w^{(\mathbf{i}_1)} \hat{u}_M^*(\mathbf{i})] \quad (46)$$

$$= n \mathbb{E}_{\mathbf{i}_1 \sim \text{Unif}} \mathbb{E}_{\mathbf{i}_2, \dots, \mathbf{i}_M \sim \text{Unif}} [w^{(\mathbf{i}_1)} \hat{u}_M^*(\mathbf{i})] \quad (47)$$

$$= n \mathbb{E}_{\mathbf{i}_1, \dots, \mathbf{i}_M \sim \text{Unif}} [w^{(\mathbf{i}_1)} \hat{u}_M^*(\mathbf{i})] \quad (48)$$

810 The expression in Equation (48) is invariant with respect to order of the indices  $\mathbf{i}_1, \dots, \mathbf{i}_M$ : the  
 811 indices in expectation in Equation (48) can be exchanged, and one thus has

$$\forall k \in \llbracket 1, M \rrbracket, \quad \mathbb{E} [\hat{u}_M^*(\mathbf{i})] = n \mathbb{E}_{\mathbf{i}_1, \dots, \mathbf{i}_M \sim \text{Unif}} [w^{(\mathbf{i}_k)} \hat{u}_M^*(\mathbf{i})] \quad . \quad (49)$$

812 Averaging Equation (49) over the indices  $k \in \llbracket 1, M \rrbracket$  yields the desired result

$$\frac{1}{M} \sum_{k=1}^M \mathbb{E} \hat{u}_M^*(\mathbf{i}) = \frac{1}{M} \sum_{k=1}^M n \mathbb{E}_{\mathbf{i}_1, \dots, \mathbf{i}_M \sim \text{Unif}} \left[ w^{(\mathbf{i}_k)} \hat{u}_M^*(\mathbf{i}) \right] \quad (50)$$

$$\mathbb{E} \hat{u}_M^*(\mathbf{i}) = \frac{1}{M} n \mathbb{E}_{\mathbf{i}_1, \dots, \mathbf{i}_M \sim \text{Unif}} \left[ \sum_{k=1}^M w^{(\mathbf{i}_k)} \hat{u}_M^*(\mathbf{i}) \right] \quad (51)$$

$$= \frac{1}{M} n \mathbb{E}_{\mathbf{i}_1, \dots, \mathbf{i}_M \sim \text{Unif}} \left[ \sum_{k=1}^M w^{(\mathbf{i}_k)} \frac{\sum_{j=1}^M w^{(\mathbf{i}_j)} u^{(\mathbf{i}_j)}}{\sum_{j=1}^M w^{(\mathbf{i}_j)}} \right] \quad (52)$$

$$= \frac{1}{M} n \mathbb{E}_{\mathbf{i}_1, \dots, \mathbf{i}_M \sim \text{Unif}} \left[ \left( \sum_{k=1}^M w^{(\mathbf{i}_k)} \right) \frac{\sum_{j=1}^M w^{(\mathbf{i}_j)} u^{(\mathbf{i}_j)}}{\left( \sum_{j=1}^M w^{(\mathbf{i}_j)} \right)} \right] \quad (53)$$

$$= \frac{1}{M} n \mathbb{E}_{\mathbf{i}_1, \dots, \mathbf{i}_M \sim \text{Unif}} \left[ \sum_{j=1}^M w^{(\mathbf{i}_j)} u^{(\mathbf{i}_j)} \right] \quad (54)$$

$$= \frac{1}{M} n \sum_{j=1}^M \mathbb{E}_{\mathbf{i}_1, \dots, \mathbf{i}_M \sim \text{Unif}} \left[ w^{(\mathbf{i}_j)} u^{(\mathbf{i}_j)} \right] \quad (55)$$

$$= \frac{1}{M} n \sum_{j=1}^M \mathbb{E}_{\mathbf{i}_j \sim \text{Unif}} \left[ w^{(\mathbf{i}_j)} u^{(\mathbf{i}_j)} \right] \quad (56)$$

$$= \frac{1}{M} n M \mathbb{E}_{l \sim \text{Unif}} \left[ w^{(l)} u^{(l)} \right] \quad (57)$$

$$= n \mathbb{E}_{l \sim \text{Unif}} \left[ w^{(l)} u^{(l)} \right] \quad (58)$$

$$= n \sum_{l=1}^n \frac{1}{n} \left[ w^{(l)} u^{(l)} \right] \quad (59)$$

$$= \sum_{l=1}^n \left[ w^{(l)} u^{(l)} \right] \quad (60)$$

$$= \hat{u}^* \quad (61)$$

814 *Proof of Item (iii).* Using the same ideas as for Item (ii), one has

$$\mathbb{E}_{x^{(1)} \sim \hat{p}_{\text{data}}(\cdot | x_t, t); b^{(2)}, \dots, b^{(M)} \sim \hat{p}_{\text{data}}} [\hat{u}_M^*(x_t, t)^2] \quad (62)$$

$$= n \mathbb{E}_{\mathbf{i}_1, \dots, \mathbf{i}_M \sim \text{Unif}} [w^{(\mathbf{i}_1)} \hat{u}_M^*(\mathbf{i})^2] \quad (63)$$

$$= n \mathbb{E}_{\mathbf{i}_1, \dots, \mathbf{i}_M \sim \text{Unif}} [w^{(\mathbf{i}_k)} \hat{u}_M^*(\mathbf{i})^2], \forall k \in \llbracket 1, M \rrbracket \quad (64)$$

$$= n \frac{1}{M} \mathbb{E}_{\mathbf{i}_1, \dots, \mathbf{i}_M \sim \text{Unif}} \left[ \sum_{k=1}^M w^{(\mathbf{i}_k)} \hat{u}_M^*(\mathbf{i})^2 \right] \quad (65)$$

$$= n \frac{1}{M} \mathbb{E}_{\mathbf{i}_1, \dots, \mathbf{i}_M \sim \text{Unif}} \left[ \sum_{k=1}^M w^{(\mathbf{i}_k)} \left( \frac{\sum_{j=1}^M w^{(\mathbf{i}_j)} u^{(\mathbf{i}_j)} }{\sum_{j=1}^M w^{(\mathbf{i}_j)} } \right)^2 \right] \quad (66)$$

$$\leq n \frac{1}{M} \mathbb{E}_{\mathbf{i}_1, \dots, \mathbf{i}_M \sim \text{Unif}} \left[ \sum_{k=1}^M w^{(\mathbf{i}_k)} \frac{\sum_{j=1}^M w^{(\mathbf{i}_j)} (u^{(\mathbf{i}_j)})^2}{\sum_{j=1}^M w^{(\mathbf{i}_j)}} \right] \text{ by convexity of } x \mapsto x^2 \quad (67)$$

$$= n \frac{1}{M} \mathbb{E}_{\mathbf{i}_1, \dots, \mathbf{i}_M \sim \text{Unif}} \left[ \left( \sum_{k=1}^M w^{(\mathbf{i}_k)} \right) \frac{\sum_{j=1}^M w^{(\mathbf{i}_j)} (u^{(\mathbf{i}_j)})^2}{\sum_{j=1}^M w^{(\mathbf{i}_j)}} \right] \quad (68)$$

$$= n \frac{1}{M} \mathbb{E}_{\mathbf{i}_1, \dots, \mathbf{i}_M \sim \text{Unif}} \left[ \sum_{j=1}^M w^{(\mathbf{i}_j)} (u^{(\mathbf{i}_j)})^2 \right] \quad (69)$$

$$= \mathbb{E}_{\mathbf{i}_1 \sim \text{Unif}} [w^{(\mathbf{i}_1)} (u^{(\mathbf{i}_1)})^2] \quad (70)$$

$$= \mathbb{E}_{l \sim \text{Unif}} [w^{(l)} (u^{(l)})^2] . \quad (71)$$

815 Hence

$$\mathbb{E}_{x^{(1)} \sim \hat{p}_{\text{data}}(\cdot | x_t, t); b^{(2)}, \dots, b^{(M)} \sim \hat{p}_{\text{data}}} [\hat{u}_M^*(x_t, t)^2] - (\hat{u}^*)^2 \leq \mathbb{E}_{l \sim \text{Unif}} [w^{(l)} (u^{(l)})^2] - (\hat{u}^*)^2 , \quad (72)$$

816 which is exactly

$$\text{Var}_{x^{(1)} \sim \hat{p}_{\text{data}}(\cdot | x_t, t); b^{(2)}, \dots, b^{(M)} \sim \hat{p}_{\text{data}}} [\hat{u}_M^*(x_t, t)] \leq \text{Var}_{x^{(1)} \sim \hat{p}_{\text{data}}(\cdot | x_t, t)} [u^{\text{cond}}(x_t, x^{(1)}, t)] . \quad (73)$$

817  $\square$

## 818 C Experiments details

819 For all the experiment we used all the same learning hyperparameters, the default ones from [Tong et al. \(2024\)](#). The hyperparameter values are summarized in Table 1. The details specific to each figure are described in Appendices C.1 to C.4

| # Channels | Batch Size | Learning Rate | EMA Decay | Gradient Clipping |
|------------|------------|---------------|-----------|-------------------|
| 128        | 128        | 0.0002        | 0.9999    | 1                 |

Table 1: Learning hyperparameters for all the CIFAR-10 and CelebA 64 experiments.

### 822 C.1 Figures 1b and 2

823 For Figure 1b no deep learning is involved: the datasets 2-moons and CIFAR-10 are loaded. Then,  
824 256 points from  $p_0 \times \hat{p}_{\text{data}}$  are drawn, and one computes the mean of the cosine similarities between  
825  $\hat{u}^*((1-t)x_0 + tx_1, t)$  and  $u^{\text{cond}}((1-t)x_0 + tx_1, z = x_1, t) = x_1 - x_0$ , for each value of  
826  $t \in \{0, 1/100, 2/100, \dots, 99/100\}$ .

827 No deep learning either is involved in Figure 2: the Imagenette dataset is loaded and spatially  
828 subsampled to resolution  $\text{dim} = 8, \text{dim} = 16, \dots, \text{dim} = 256$ , *i.e.*, with  $d = \lceil \cdot \rceil \cdot 8^2$ ,  $d =$   
829  $3 \cdot 16^2, \dots, d = 3 \cdot 256^2$ . Then, as for Figure 1b, batches of 256 points from  $p_0$  and  $p_{\text{data}}$  are  
830 drawn, and one computes the percentage of cosine similarities between  $\hat{u}^*((1-t)x_0 + tx_1, t)$  and  
831  $u^{\text{cond}}((1-t)x_0 + tx_1, z = x_1, t) = x_1 - x_0$ , that are larger than 0.9, for multiple time values  $t$ .

## 832 C.2 Figure 3

833 In Figure 3, networks are trained with a vanilla conditional flow matching, with the standard 34  
834 million parameters U-Net for diffusion by Nichol and Dhariwal (2021), with default settings from the  
835 `torchfm` codebase<sup>3</sup> (Tong et al., 2024). Training uses the CFM loss. For this specific experiment,  
836 **we removed the usual random flip transform**, for  $\hat{u}^*$  to be simpler and easier to estimate by  $u_\theta$ .  
837 For each “data” subsampling of the dataset, we trained the model for  $5 \cdot 10^4$  iterations, with a batch  
838 size of 128, *i.e.*, we trained the models for 128 epochs.

## 839 C.3 Figure 4

840 In Figure 4, for each dataset (CIFAR-10 and CelebA 64), one network is trained using a vanilla  
841 conditional flow matching with the default parameters of Tong et al. (2024) (the most important ones  
842 are recalled in Table 1). Then images are generated first following the closed-form formula of the  
843 optimal velocity field  $\hat{u}^*$  from 0 to  $\tau$ . And then following the velocity field learned with a usual  
844 conditional flow matching  $u_\theta$  from  $\tau$  to 1.

## 845 C.4 Figure 5

846 For experiments involving training on CIFAR-10 (Figures 3 and 4), we rely on the standard 34  
847 million parameters U-Net for diffusion by Nichol and Dhariwal (2021), with default settings from  
848 the `torchfm` codebase (Tong et al., 2024). For each algorithm, the networks are trained for 500k  
849 iterations with batch size 128, *i.e.*, 1280 epochs.

850 For CelebA  $64 \times 64$  (Figure 4), we rely on the training script of `pnpflow` library<sup>4</sup> (Martin et al.,  
851 2025), which uses a U-Net from Huang et al. (2021); Ho et al. (2020b).

---

<sup>3</sup><https://github.com/atong01/conditional-flow-matching>

<sup>4</sup><https://github.com/annegnx/PnP-Flow>
