# Supplementary material
Source: ML conference proceedings conference paper supplement (https://openreview.net/forum?id=kVz9uvqUna)
Supplement: supplementary_material [file supplementary_only.pdf › supplementary_only.pdf]

751 **A Proofs of Section 2**

752 **A.1 Proof of Proposition 1**

753 *Proof.* • In the case where  $z \sim \hat{p}_{\text{data}}$ , conditional probability writes

$$p(z = x^{(i)}|x, t) = \frac{p(x, t, z = x^{(i)})}{p(x, t)} \quad (9)$$

$$= \frac{p(x|t, z = x^{(i)})p(t, z = x^{(i)})}{p(x, t)} \quad (10)$$

$$= \frac{p(x|t, z = x^{(i)})p(t, z = x^{(i)})}{\sum_{i'=1}^n p(x, t, z = x^{(i')})} \quad (11)$$

$$= \frac{p(x|t, z = x^{(i)})p(t) \overbrace{p(z = x^{(i)})}^{\frac{1}{n}}}{\sum_{i'=1}^n p(x|t, z = x^{(i')})p(t) \underbrace{p(z = x^{(i')})}_{\frac{1}{n}}} \quad (12)$$

$$= \frac{p(x|t, z = x^{(i)})}{\sum_{i'=1}^n p(x|t, z = x^{(i')})} . \quad (13)$$

754 Plugging Equation (13) in Equation (2) yields the closed-form formula for the velocity field:

$$u^*(x, t) = \sum_{i=1}^n u^{\text{cond}}(x, t, z = x^{(i)})p(z = x^{(i)}|x, t) \quad (14)$$

$$= \sum_{i=1}^n u^{\text{cond}}(x, t, z = x^{(i)}) \frac{p(x|t, z = x^{(i)})}{\sum_{i'=1}^n p(x|t, z = x^{(i')})} . \quad (15)$$

755 which proves Equation (5); using that  $x|t, z = x^{(i)} \sim \mathcal{N}(tx^{(i)}, (1-t)^2 \text{Id})$  and  $u^{\text{cond}}(x, t, z =$   
 756  $x^{(i)}) = \frac{x^{(i)} - x}{1-t}$  yields Equation (6).

757 • For the case  $z \sim p_0 \times \hat{p}_{\text{data}}$ ,

$$\hat{u}^*(x, t) := \int_z u^{\text{cond}}(x, t, z)p(z|x, t) \, dz \quad (16)$$

$$= \int_z u^{\text{cond}}(x, t, z) \frac{p(x, z, t)}{p(x, t)} \, dz \quad (17)$$

$$= \int_z u^{\text{cond}}(x, t, z) \frac{p(x|z, t)p(z)p(t)}{\int_{z'} p(x|t, z')p(t)p(z') \, dz'} \, dz \quad (18)$$

$$= \int_z u^{\text{cond}}(x, t, z) \frac{p(x|z, t)p(z)}{\int_{z'} p(x|t, z')p(z') \, dz'} \, dz \quad (19)$$

758 Now for the denominator, since  $z \sim p_0 \times \hat{p}_{\text{data}}$ :

$$\int_{z'} p(x|t, z')p(z') \, dz' = \int_{x_0} \sum_{i=1}^n \delta_{(1-t)x_0 + tx^{(i)}}(x) \frac{1}{\sqrt{2\pi}} \exp\left(-\frac{1}{2}x_0^2\right) dx_0 \quad (20)$$

$$= \sum_{i=1}^n \frac{1}{\sqrt{2\pi}} \exp\left(-\frac{1}{2(1-t)^2}(x - tx^{(i)})^2\right) \quad (21)$$

759 since  $\delta_{(1-t)x_0 + tx^{(i)}}(x)$  imposes  $x = (1-t)x_0 + tx^{(i)}$ , meaning  $x_0 = \frac{x - tx^{(i)}}{1-t}$ .

Equivalently, the Dirac imposes  $x^{(i)} - x_0 = \frac{x^{(i)} - x}{1-t}$ , hence for the numerator:

$$\int_z u^{\text{cond}}(x, t, z) p(x|z, t) p(z) dz \int_{x_0} \sum_{i=1}^n (x^{(i)} - x_0) \delta_{(1-t)x_0 + tx^{(i)}}(x) \frac{1}{\sqrt{2\pi}} \exp\left(-\frac{1}{2}\|x_0\|^2\right) dx_0 \quad (22)$$

$$= \sum_{i=1}^n \frac{x^{(i)} - x}{1-t} \frac{1}{\sqrt{2\pi}} \exp\left(-\frac{1}{2(1-t)^2}\|x - tx^{(i)}\|^2\right) \quad (23)$$

Taking the ratio of Equations (21) and (23) concludes the proof.  $\square$

## B Additional details and comments on empirical flow matching

First, recalls on the optimal velocity (Equation (6)) and the empirical flow matching loss (Equations (7) and (8)) are provided in Appendix B.1. The unbiasedness of the estimator is presented in Appendix B.2, and its proof is in Appendix B.3.

### B.1 Recalls

The closed-form formula of the "optimal" velocity field is:

$$\hat{u}^*(x, t) = \sum_{l=1}^n \frac{x^{(l)} - x}{1-t} \cdot \left[ \text{softmax} \left( \left( -\frac{\|x - tx^{(k)}\|^2}{2(1-t)^2} \right)_{k=1, \dots, n} \right) \right]_l \quad (6)$$

The proposed loss uses mini-batches of size  $M$  (instead of all  $n$  training points) to build an estimator  $\hat{u}_M^*$  of  $\hat{u}^*$ :

$$\mathcal{L}_{\text{EFM}}(\theta) = \mathbb{E}_{\substack{t \sim \mathcal{U}([0,1]) \\ x_0 \sim p_0 \\ x_1 \sim \hat{p}_{\text{data}} \\ x_t = (1-t)x_0 + tx_1 \\ b^{(1)} := x_1; b^{(2)}, \dots, b^{(M)} \sim \hat{p}_{\text{data}}}} \|u_\theta(x_t, t) - \hat{u}_M^*(x_t, t)\|^2, \quad (7)$$

with

$$\hat{u}_M^*(x_t, t) = \sum_{j=1}^M \frac{b^{(j)} - x_t}{1-t} \cdot \left[ \text{softmax} \left( \left( -\frac{\|x_t - tb^{(k)}\|^2}{2(1-t)^2} \right)_{k=1, \dots, M} \right) \right]_j \quad (8)$$

Crucially, in Equation (7) the sample  $b^{(1)}$  depends on  $x_t$  and is reused in the estimate  $\hat{u}_M^*$ . This important detail yields an unbiased estimator of  $\hat{u}^*$ .

### B.2 Theoretical properties of the proposed estimator

**Proposition 2.** Let  $\hat{p}_{\text{data}}(z|x, t)$  denote  $p(z|x, t)$ , meaning a probability distribution on  $\{x^{(i)}\}_{i=1}^n$ , with expression given by Equation (13). With no constraints on the learned velocity field  $u_\theta$ ,

i) The minimizer of Equation (7) writes, for all  $(x, t)$

$$\mathbb{E}_{b^{(1)} \sim \hat{p}_{\text{data}}(\cdot|x, t); b^{(2)}, \dots, b^{(M)} \sim \hat{p}_{\text{data}}} [\hat{u}_M^*(x, t)] \quad (24)$$

ii) In addition, for all  $(x, t)$ , the minimizer of Equation (7) equals the optimal velocity field, i.e.,

$$\mathbb{E}_{b^{(1)} \sim \hat{p}_{\text{data}}(\cdot|x, t); b^{(2)}, \dots, b^{(M)} \sim \hat{p}_{\text{data}}} [\hat{u}_M^*(x, t)] = \hat{u}^*(x, t) \quad (25)$$

iii) The conditional variance of the estimator  $\hat{u}_M^*$  is smaller than the usual conditional variance:

$$\text{Var}_{b^{(1)} \sim \hat{p}_{\text{data}}(\cdot|x, t); b^{(2)}, \dots, b^{(M)} \sim \hat{p}_{\text{data}}} [\hat{u}_M^*(x, t)] \leq \text{Var}_{b^{(1)} \sim \hat{p}_{\text{data}}(\cdot|x, t)} [u^{\text{cond}}(x, b^{(1)}, t)] \quad (26)$$

778 The proof of Proposition 2 can be found in Appendix B.3. First, we discuss below the relation  
779 between Proposition 2 and the sampling literature.

780 **Links with importance sampling.** The estimator  $\hat{u}^*$  in Equation (6) can be seen as a form of  
781 *importance sampling* (see Robert et al. 1999, Chap. 3 for an in-depth reference). In a nutshell,  
782 importance sampling is a way to estimate an expectation when one cannot easily sample from the  
783 random variable it depends on. More precisely, in the ideal case  $z \sim p_{\text{data}}$  (as opposed to  $z \sim \hat{p}_{\text{data}}$ ),  
784 the velocity field formula is the following

$$u^*(x_t, t) = \mathbb{E}_{z|x_t, t} [u^{\text{cond}}(x_t, z, t)] \quad (27)$$

$$= \int_z u^{\text{cond}}(x_t, z, t) p(z|x_t, t) dz \quad (28)$$

785 When  $z \sim p_{\text{data}}$ , it is difficult to sample from  $z|x_t, t$ , but the latter equation can be rewritten as

$$u^*(x_t, t) = \int_z u^{\text{cond}}(x_t, z, t) \frac{p(z|x_t, t)}{p(z)} p(z) dz \quad (29)$$

786 and one can easily sample from  $z \sim \hat{p}_{\text{data}}$  using the empirical data distribution  $x^{(1)}, \dots, x^{(n)}$

$$u^*(x_t, t) \approx \frac{1}{n} \sum_{i=1}^n u^{\text{cond}}(x_t, x^{(i)}, t) \frac{p(z = x^{(i)}|x_t, t)}{p(x^{(i)})} \quad (30)$$

$$= \sum_{i=1}^n u^{\text{cond}}(x_t, x^{(i)}, t) p(z = x^{(i)}|x_t, t) \quad (31)$$

$$:= \hat{u}^*(x_t, t) \quad (32)$$

787 **Links with self-normalized importance sampling.** The estimator  $\hat{u}_M^*$  in Equation (8) draws  
788 strong connections with self-normalized importance sampling (see Owen 2013, Chap. 9.2), and  
789 Rao-Blackwelled estimators (Casella and Robert, 1996; Cardoso et al., 2022). Very importantly,  
790 as discussed in Ryzhakov et al. (2024), self-normalized important sampling estimators are usually  
791 biased, in the sense that in general:

$$\mathbb{E}_{b^{(1)}, \dots, b^{(M)} \sim \hat{p}_{\text{data}}} \hat{u}_M^*(x_t, t) \neq u^*(x_t, t) \quad (33)$$

792 A crucial point is that our estimator includes  $b^{(1)} \sim \hat{p}_{\text{data}}(\cdot|x_t, t)$ , which yields the main result of  
793 Proposition 2

$$\mathbb{E}_{b^{(1)} \sim \hat{p}_{\text{data}}(\cdot|x_t, t), b^{(2)}, \dots, b^{(M)} \sim p_{\text{data}}} [\hat{u}_M^*(x_t, t)] = u^*(x_t, t) \quad (34)$$

794 Finally, this idea of regressing against a more deterministic target derived from the optimal closed-  
795 form velocity field has also been empirically explored for diffusion models (Xu et al., 2023).

### 796 B.3 Proof of Proposition 2

797 *Proof of Item (i).* With no constraints on  $u_\theta$ , the empirical flow matching loss writes:

$$\mathbb{E}_{\substack{t \sim \mathcal{U}([0,1]) \\ x_1 \sim \hat{p}_{\text{data}} \\ x_t = (1-t)x_0 + tx_1 \\ b^{(1)} := x_1; b^{(2)}, \dots, b^{(M)} \sim \hat{p}_{\text{data}}}} \|u_\theta(x_t, t) - \hat{u}_M^*(x_t, t)\|^2, \quad (35)$$

$$= \mathbb{E}_{\substack{t \sim \mathcal{U}([0,1]) \\ x_t \sim p_t}} \mathbb{E}_{\substack{b^{(1)} \sim \hat{p}_{\text{data}}(\cdot|x_t, t) \\ b^{(2)}, \dots, b^{(M)}|x_t, t}} \|u_\theta(x_t, t) - \hat{u}_M^*(x_t, t)\|^2, \quad (36)$$

$$= \mathbb{E}_{\substack{t \sim \mathcal{U}([0,1]) \\ x_t \sim p_t}} \mathbb{E}_{\substack{b^{(1)} := \hat{p}_{\text{data}}(\cdot|x_t, t) \\ b^{(2)}, \dots, b^{(M)} \sim \hat{p}_{\text{data}}}} \|u_\theta(x_t, t) - \hat{u}_M^*(x_t, t)\|^2 \text{ because } b^{(2)}, \dots, b^{(M)} \perp\!\!\!\perp x_t, t, \quad (37)$$

798 which is minimized when for all  $x_t, t$

$$u_\theta(x_t, t) = \mathbb{E}_{\substack{b^{(1)} \sim \hat{p}_{\text{data}}(\cdot|x_t, t) \\ b^{(2)}, \dots, b^{(M)} \sim \hat{p}_{\text{data}}}} [\hat{u}_M^*(x_t, t)] \quad (38)$$

799

□

800 *Proof of Item (ii).* The minimizer for a given  $(x_t, t)$ , removing these elements from the notation for  
 801 conciseness and abstraction, is a weighted mean:

$$\hat{u}^*(x_t, t) = \hat{u}^* = \sum_{l=1}^n w^{(l)} u^{(l)} \quad , \quad \text{with} \quad (39)$$

$$w^{(l)} = \hat{p}_{\text{data}}(z = x^{(l)} | t, x_t) \quad , \quad \sum_{l=1}^n w^{(l)} = 1 \quad (40)$$

$$u^{(l)} = u^{\text{cond}}(x_t, x^{(l)}, t) \quad (41)$$

802 We express a mini-batch as an  $M$ -valued vector of indices,  $\mathbf{i} \in \llbracket 1, n \rrbracket^M$ . The mini-batch estimate  
 803 from Equation (7), considering the definition of the softmax, can be expressed as a mini-batch  
 804 weighted-mean:

$$\hat{u}_M^*(\mathbf{i}) = \frac{\sum_{j=1}^M w^{(\mathbf{i}_j)} u^{(\mathbf{i}_j)}}{\sum_{j=1}^M w^{(\mathbf{i}_j)}} \quad (42)$$

805 The categorical distribution over  $\llbracket 1, n \rrbracket$  with probabilities following the weights  $w$  in (40) is denoted  
 806  $\text{Cat}(w)$  and the uniform distribution, *i.e.*,  $\text{Cat}(\mathbf{1}/n)$ , is denoted  $\text{Unif}$ .

807 The main result of the following is that, in expectation over the biased-mini-batches, **where the first**  
 808 **point is drawn according to**  $w$  and the  $M - 1$  other points are drawn uniformly, the mini-batch  
 809 weighted-mean is an unbiased estimate of the  $w$ -weighted-mean  $\hat{u}^*$ .

$$\mathbb{E} [\hat{u}_M^*(\mathbf{i})] := \mathbb{E}_{\mathbf{i}_1 \sim \text{Cat}(w)} \mathbb{E}_{\mathbf{i}_2, \dots, \mathbf{i}_M \sim \text{Unif}} [\hat{u}_M^*(\mathbf{i})] \quad (43)$$

$$= \sum_{\mathbf{i}_1=1}^n w^{(\mathbf{i}_1)} \mathbb{E}_{\mathbf{i}_2, \dots, \mathbf{i}_M \sim \text{Unif}} [\hat{u}_M^*(\mathbf{i})] \quad (44)$$

$$= \sum_{\mathbf{i}_1=1}^n \mathbb{E}_{\mathbf{i}_2, \dots, \mathbf{i}_M \sim \text{Unif}} [w^{(\mathbf{i}_1)} \hat{u}_M^*(\mathbf{i})] \quad (45)$$

$$= n \sum_{\mathbf{i}_1=1}^n \frac{1}{n} \mathbb{E}_{\mathbf{i}_2, \dots, \mathbf{i}_M \sim \text{Unif}} [w^{(\mathbf{i}_1)} \hat{u}_M^*(\mathbf{i})] \quad (46)$$

$$= n \mathbb{E}_{\mathbf{i}_1 \sim \text{Unif}} \mathbb{E}_{\mathbf{i}_2, \dots, \mathbf{i}_M \sim \text{Unif}} [w^{(\mathbf{i}_1)} \hat{u}_M^*(\mathbf{i})] \quad (47)$$

$$= n \mathbb{E}_{\mathbf{i}_1, \dots, \mathbf{i}_M \sim \text{Unif}} [w^{(\mathbf{i}_1)} \hat{u}_M^*(\mathbf{i})] \quad (48)$$

810 The expression in Equation (48) is invariant with respect to order of the indices  $\mathbf{i}_1, \dots, \mathbf{i}_M$ : the  
 811 indices in expectation in Equation (48) can be exchanged, and one thus has

$$\forall k \in \llbracket 1, M \rrbracket, \quad \mathbb{E} [\hat{u}_M^*(\mathbf{i})] = n \mathbb{E}_{\mathbf{i}_1, \dots, \mathbf{i}_M \sim \text{Unif}} [w^{(\mathbf{i}_k)} \hat{u}_M^*(\mathbf{i})] \quad . \quad (49)$$

812 Averaging Equation (49) over the indices  $k \in \llbracket 1, M \rrbracket$  yields the desired result

$$\frac{1}{M} \sum_{k=1}^M \mathbb{E} \hat{u}_M^*(\mathbf{i}) = \frac{1}{M} \sum_{k=1}^M n \mathbb{E}_{\mathbf{i}_1, \dots, \mathbf{i}_M \sim \text{Unif}} \left[ w^{(\mathbf{i}_k)} \hat{u}_M^*(\mathbf{i}) \right] \quad (50)$$

$$\mathbb{E} \hat{u}_M^*(\mathbf{i}) = \frac{1}{M} n \mathbb{E}_{\mathbf{i}_1, \dots, \mathbf{i}_M \sim \text{Unif}} \left[ \sum_{k=1}^M w^{(\mathbf{i}_k)} \hat{u}_M^*(\mathbf{i}) \right] \quad (51)$$

$$= \frac{1}{M} n \mathbb{E}_{\mathbf{i}_1, \dots, \mathbf{i}_M \sim \text{Unif}} \left[ \sum_{k=1}^M w^{(\mathbf{i}_k)} \frac{\sum_{j=1}^M w^{(\mathbf{i}_j)} u^{(\mathbf{i}_j)}}{\sum_{j=1}^M w^{(\mathbf{i}_j)}} \right] \quad (52)$$

$$= \frac{1}{M} n \mathbb{E}_{\mathbf{i}_1, \dots, \mathbf{i}_M \sim \text{Unif}} \left[ \left( \sum_{k=1}^M w^{(\mathbf{i}_k)} \right) \frac{\sum_{j=1}^M w^{(\mathbf{i}_j)} u^{(\mathbf{i}_j)}}{\left( \sum_{j=1}^M w^{(\mathbf{i}_j)} \right)} \right] \quad (53)$$

$$= \frac{1}{M} n \mathbb{E}_{\mathbf{i}_1, \dots, \mathbf{i}_M \sim \text{Unif}} \left[ \sum_{j=1}^M w^{(\mathbf{i}_j)} u^{(\mathbf{i}_j)} \right] \quad (54)$$

$$= \frac{1}{M} n \sum_{j=1}^M \mathbb{E}_{\mathbf{i}_1, \dots, \mathbf{i}_M \sim \text{Unif}} \left[ w^{(\mathbf{i}_j)} u^{(\mathbf{i}_j)} \right] \quad (55)$$

$$= \frac{1}{M} n \sum_{j=1}^M \mathbb{E}_{\mathbf{i}_j \sim \text{Unif}} \left[ w^{(\mathbf{i}_j)} u^{(\mathbf{i}_j)} \right] \quad (56)$$

$$= \frac{1}{M} n M \mathbb{E}_{l \sim \text{Unif}} \left[ w^{(l)} u^{(l)} \right] \quad (57)$$

$$= n \mathbb{E}_{l \sim \text{Unif}} \left[ w^{(l)} u^{(l)} \right] \quad (58)$$

$$= n \sum_{l=1}^n \frac{1}{n} \left[ w^{(l)} u^{(l)} \right] \quad (59)$$

$$= \sum_{l=1}^n \left[ w^{(l)} u^{(l)} \right] \quad (60)$$

$$= \hat{u}^* \quad (61)$$

814 *Proof of Item (iii).* Using the same ideas as for Item (ii), one has

$$\mathbb{E}_{x^{(1)} \sim \hat{p}_{\text{data}}(\cdot | x_t, t); b^{(2)}, \dots, b^{(M)} \sim \hat{p}_{\text{data}}} [\hat{u}_M^*(x_t, t)^2] \quad (62)$$

$$= n \mathbb{E}_{\mathbf{i}_1, \dots, \mathbf{i}_M \sim \text{Unif}} [w^{(\mathbf{i}_1)} \hat{u}_M^*(\mathbf{i})^2] \quad (63)$$

$$= n \mathbb{E}_{\mathbf{i}_1, \dots, \mathbf{i}_M \sim \text{Unif}} [w^{(\mathbf{i}_k)} \hat{u}_M^*(\mathbf{i})^2], \forall k \in \llbracket 1, M \rrbracket \quad (64)$$

$$= n \frac{1}{M} \mathbb{E}_{\mathbf{i}_1, \dots, \mathbf{i}_M \sim \text{Unif}} \left[ \sum_{k=1}^M w^{(\mathbf{i}_k)} \hat{u}_M^*(\mathbf{i})^2 \right] \quad (65)$$

$$= n \frac{1}{M} \mathbb{E}_{\mathbf{i}_1, \dots, \mathbf{i}_M \sim \text{Unif}} \left[ \sum_{k=1}^M w^{(\mathbf{i}_k)} \left( \frac{\sum_{j=1}^M w^{(\mathbf{i}_j)} u^{(\mathbf{i}_j)}}{\sum_{j=1}^M w^{(\mathbf{i}_j)}} \right)^2 \right] \quad (66)$$

$$\leq n \frac{1}{M} \mathbb{E}_{\mathbf{i}_1, \dots, \mathbf{i}_M \sim \text{Unif}} \left[ \sum_{k=1}^M w^{(\mathbf{i}_k)} \frac{\sum_{j=1}^M w^{(\mathbf{i}_j)} (u^{(\mathbf{i}_j)})^2}{\sum_{j=1}^M w^{(\mathbf{i}_j)}} \right] \text{ by convexity of } x \mapsto x^2 \quad (67)$$

$$= n \frac{1}{M} \mathbb{E}_{\mathbf{i}_1, \dots, \mathbf{i}_M \sim \text{Unif}} \left[ \left( \sum_{k=1}^M w^{(\mathbf{i}_k)} \right) \frac{\sum_{j=1}^M w^{(\mathbf{i}_j)} (u^{(\mathbf{i}_j)})^2}{\sum_{j=1}^M w^{(\mathbf{i}_j)}} \right] \quad (68)$$

$$= n \frac{1}{M} \mathbb{E}_{\mathbf{i}_1, \dots, \mathbf{i}_M \sim \text{Unif}} \left[ \sum_{j=1}^M w^{(\mathbf{i}_j)} (u^{(\mathbf{i}_j)})^2 \right] \quad (69)$$

$$= \mathbb{E}_{\mathbf{i}_1 \sim \text{Unif}} [w^{(\mathbf{i}_1)} (u^{(\mathbf{i}_1)})^2] \quad (70)$$

$$= \mathbb{E}_{l \sim \text{Unif}} [w^{(l)} (u^{(l)})^2] . \quad (71)$$

815 Hence

$$\mathbb{E}_{x^{(1)} \sim \hat{p}_{\text{data}}(\cdot | x_t, t); b^{(2)}, \dots, b^{(M)} \sim \hat{p}_{\text{data}}} [\hat{u}_M^*(x_t, t)^2] - (\hat{u}^*)^2 \leq \mathbb{E}_{l \sim \text{Unif}} [w^{(l)} (u^{(l)})^2] - (\hat{u}^*)^2 , \quad (72)$$

816 which is exactly

$$\text{Var}_{x^{(1)} \sim \hat{p}_{\text{data}}(\cdot | x_t, t); b^{(2)}, \dots, b^{(M)} \sim \hat{p}_{\text{data}}} [\hat{u}_M^*(x_t, t)] \leq \text{Var}_{x^{(1)} \sim \hat{p}_{\text{data}}(\cdot | x_t, t)} [u^{\text{cond}}(x_t, x^{(1)}, t)] . \quad (73)$$

817  $\square$

## 818 C Experiments details

819 For all the experiment we used all the same learning hyperparameters, the default ones from [Tong et al. \(2024\)](#). The hyperparameter values are summarized in Table 1. The details specific to each figure are described in Appendices C.1 to C.4

| # Channels | Batch Size | Learning Rate | EMA Decay | Gradient Clipping |
|------------|------------|---------------|-----------|-------------------|
| 128        | 128        | 0.0002        | 0.9999    | 1                 |

Table 1: Learning hyperparameters for all the CIFAR-10 and CelebA 64 experiments.

### 822 C.1 Figures 1b and 2

823 For Figure 1b no deep learning is involved: the datasets 2-moons and CIFAR-10 are loaded. Then,  
824 256 points from  $p_0 \times \hat{p}_{\text{data}}$  are drawn, and one computes the mean of the cosine similarities between  
825  $\hat{u}^*((1-t)x_0 + tx_1, t)$  and  $u^{\text{cond}}((1-t)x_0 + tx_1, z = x_1, t) = x_1 - x_0$ , for each value of  
826  $t \in \{0, 1/100, 2/100, \dots, 99/100\}$ .

827 No deep learning either is involved in Figure 2: the Imagenette dataset is loaded and spatially  
828 subsampled to resolution  $\text{dim} = 8, \text{dim} = 16, \dots, \text{dim} = 256$ , *i.e.*, with  $d = \lceil \cdot \rceil \cdot 8^2$ ,  $d =$   
829  $3 \cdot 16^2, \dots, d = 3 \cdot 256^2$ . Then, as for Figure 1b, batches of 256 points from  $p_0$  and  $p_{\text{data}}$  are  
830 drawn, and one computes the percentage of cosine similarities between  $\hat{u}^*((1-t)x_0 + tx_1, t)$  and  
831  $u^{\text{cond}}((1-t)x_0 + tx_1, z = x_1, t) = x_1 - x_0$ , that are larger than 0.9, for multiple time values  $t$ .

## 832 C.2 Figure 3

833 In Figure 3, networks are trained with a vanilla conditional flow matching, with the standard 34  
834 million parameters U-Net for diffusion by Nichol and Dhariwal (2021), with default settings from the  
835 `torchfm` codebase<sup>3</sup> (Tong et al., 2024). Training uses the CFM loss. For this specific experiment,  
836 **we removed the usual random flip transform**, for  $\hat{u}^*$  to be simpler and easier to estimate by  $u_\theta$ .  
837 For each “data” subsampling of the dataset, we trained the model for  $5 \cdot 10^4$  iterations, with a batch  
838 size of 128, *i.e.*, we trained the models for 128 epochs.

## 839 C.3 Figure 4

840 In Figure 4, for each dataset (CIFAR-10 and CelebA 64), one network is trained using a vanilla  
841 conditional flow matching with the default parameters of Tong et al. (2024) (the most important ones  
842 are recalled in Table 1). Then images are generated first following the closed-form formula of the  
843 optimal velocity field  $\hat{u}^*$  from 0 to  $\tau$ . And then following the velocity field learned with a usual  
844 conditional flow matching  $u_\theta$  from  $\tau$  to 1.

## 845 C.4 Figure 5

846 For experiments involving training on CIFAR-10 (Figures 3 and 4), we rely on the standard 34  
847 million parameters U-Net for diffusion by Nichol and Dhariwal (2021), with default settings from  
848 the `torchfm` codebase (Tong et al., 2024). For each algorithm, the networks are trained for 500k  
849 iterations with batch size 128, *i.e.*, 1280 epochs.

850 For CelebA  $64 \times 64$  (Figure 4), we rely on the training script of `pnpflow` library<sup>4</sup> (Martin et al.,  
851 2025), which uses a U-Net from Huang et al. (2021); Ho et al. (2020b).

---

<sup>3</sup><https://github.com/atong01/conditional-flow-matching>

<sup>4</sup><https://github.com/annegnx/PnP-Flow>
